# Supplementary material for: Expeditious synthesis of highly substituted 3(2H)-furanone and quinoline by microwave assisted reaction between aldonitrones and dibenzoylacetylene
Source: Royal Society of Chemistry journal article supplement (doi:10.1039/d2nj00991a), 2022-01-01
Supplement: d2nj00991a1.pdf [file d2nj00991a1.pdf]

## Supplementary Information

### Expeditious synthesis of highly substituted 3(2*H*)-furanone and quinoline by the microwave assisted reaction between aldonitrones and DBA

Sumi P. Musthafa,<sup>a</sup> Jesna Antony,<sup>a</sup> Rakesh Natarajan\*<sup>a</sup> and John P. Rappai\*<sup>b</sup>

<sup>a</sup>*Department of Applied Chemistry, Cochin University of Science and Technology, Kochi-22, India.*

<sup>b</sup>*Department of Chemistry, Government Victoria College, Palakkad-678001, India.*

E-mail: [johnnedumpal@gmail.com](mailto:johnnedumpal@gmail.com); [rakesh.poonath@gmail.com](mailto:rakesh.poonath@gmail.com)

### CONTENTS

|    |                                                                                                                                |         |
|----|--------------------------------------------------------------------------------------------------------------------------------|---------|
| 1) | General experimental methods                                                                                                   | S2      |
| 2) | Optimization study of Microwave assisted reaction of nitrone <b>1a</b> with DBA ( <b>2</b> ) in acetonitrile                   | S2-S3   |
| 3) | Spectral and analytical data of furanone <b>5</b>                                                                              | S3-S28  |
| 4) | Spectral and analytical data of quinoline <b>8</b>                                                                             | S29-S36 |
| 5) | Microwave assisted reaction of nitrone <b>1a-j</b> with DBA ( <b>2</b> ) in acetonitrile                                       | S37     |
| 6) | General procedure for the reaction of nitrone <b>1a,c,f</b> with DBA ( <b>2</b> ) in acetonitrile (under conventional heating) | S38     |

## General experimental techniques:

Unless otherwise noted, all commercial materials were used without purification. Oven dried glasswares were used for all reactions. Column chromatography using silica gel (Spectrochem Chemicals, 60–120 mesh) is used for the separation and purification of compounds. Further purification was done by recrystallization from appropriate solvent systems. Melting points were determined using a Neolab melting point apparatus and are uncorrected. Jasco 4100 and ABB Bomem (MB Series) FT-IR spectrometers were used for recording IR-spectra. Bruker Avance III FT-NMR spectrometer with TMS as internal standard was used to record the  $^1\text{H}$  and  $^{13}\text{C}$  NMR and the chemical shifts ( $\delta$ ) are reported in ppm. Vario EL III CHNS Elemental Analyser was used to perform the elemental analysis. Molecular mass was determined using a GC-MS (Agilent GC-7890A, Mass-5975C) mass spectrometer. Multi-wave Pro, Anton Paar 850W was used for microwave irradiation. Literature procedures were followed for the preparation of nitrones. Products formed were identified either by coinjection onto GC column (for liquids) or on the basis of mixture melting points recorded for compounds admixed with authentic samples (for solids) prepared through known methods.

## Experimental section

### I) Optimization study of Microwave assisted reaction of nitrone **1a** with DBA (**2**) in acetonitrile

To the solution of nitrone **1a** (1 mmol, 0.1970 g) in 5 mL of acetonitrile, DBA (**2**, 1 mmol, 0.2340 g) was added. The resulting reaction mixture was placed on a Pyrex tube with a cover and then irradiated in a microwave oven for at 60 °C to complete the reaction. Progress of the reaction was monitored regularly by GC. After 5 minutes, GC analysis shows the presence of 30% unreacted nitrone. The reaction was continued for another 5 minutes and the GC results shows a significant amount of unreacted nitrone. After 15 minutes of irradiation at 60 °C the reaction mixture still contains nearly 10% unreacted nitrone. Another solution of nitrone **1a** (1 mmol) in 5 mL of acetonitrile, DBA (**2**, 1 mmol) was then irradiated at 90 °C to complete the reaction. After 5 minutes, GC analysis shows the presence of 20% unreacted nitrone. The reaction was continued for another 5 minutes and still it contains 10% of unreacted nitrone. The amount of unreacted nitrone was reduced to <3% after 15 minutes of irradiation at 90 °C, solvent was removed under reduced pressure and products were isolated and purified by a combination of column chromatography over silica gel and fractional crystallization from hexane-dichloromethane mixtures to give 2-hydroxy-2,5-diphenyl-4-(phenylamino)furan-3(2*H*)-one (**5**) in

68% yield; melting point 150-152 °C, (3-hydroxy-2-phenylquinolin-4-yl)(phenyl)methanone (**8**) in 24% yield; melting point 142-144 °C along with benzaldehyde (**4a**) in 92% yield.

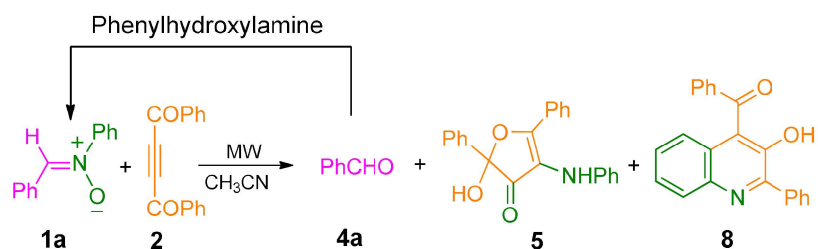

### Spectral and analytical data of 2-hydroxy-2,5-diphenyl-4-(phenylamino)furan-3(2H)-one (**5**)

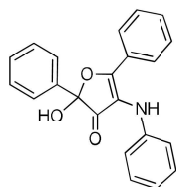

#### **2-Hydroxy-2,5-diphenyl-4-(phenylamino)furan-3(2H)-one (5).**

Yield: 68%, (0.2340 g); M.p. 150-152 °C; Characteristics: Orange crystalline solid.;

**IR** ( $\tilde{\nu}$ , KBr): 3354  $\text{cm}^{-1}$ , 3297  $\text{cm}^{-1}$  (OH, NH), 1673  $\text{cm}^{-1}$  (C=O);  **$^1\text{H}$  NMR** (400 MHz,  $\text{CDCl}_3$ )  $\delta_{\text{H}}$  8.14 (d,  $J = 7.4$  Hz, 2H), 7.59-7.75- (m, 2H), 7.55 (t,  $J = 7.4$  Hz, 1H), 7.45 (t,  $J = 7.8$  Hz, 2H), 7.33-7.43- (m, 3H), 7.12 (t,  $J = 8.0$  Hz, 2H), 6.80 (d,  $J = 7.3$  Hz, 1H), 6.60 (d,  $J = 7.8$  Hz, 2H), 5.1 (s, 1H), 4.60 (bs, 1H);  **$^{13}\text{C}$  NMR** (100 MHz,  $\text{CDCl}_3$ )  $\delta_{\text{C}}$  198.7, 176.3, 144.2, 135.8, 132.9, 129.7, 129.3, 128.8, 128.5, 125.8, 119.8, 115.1, 114.7; **MS**:  $m/z$  343.1218 ( $\text{M}^+$ ). Elemental analysis calculated for  $\text{C}_{22}\text{H}_{17}\text{NO}_3$ : C, 76.95; H, 4.99; N, 4.08. Found: C, 76.72; H, 4.97; N, 4.09.

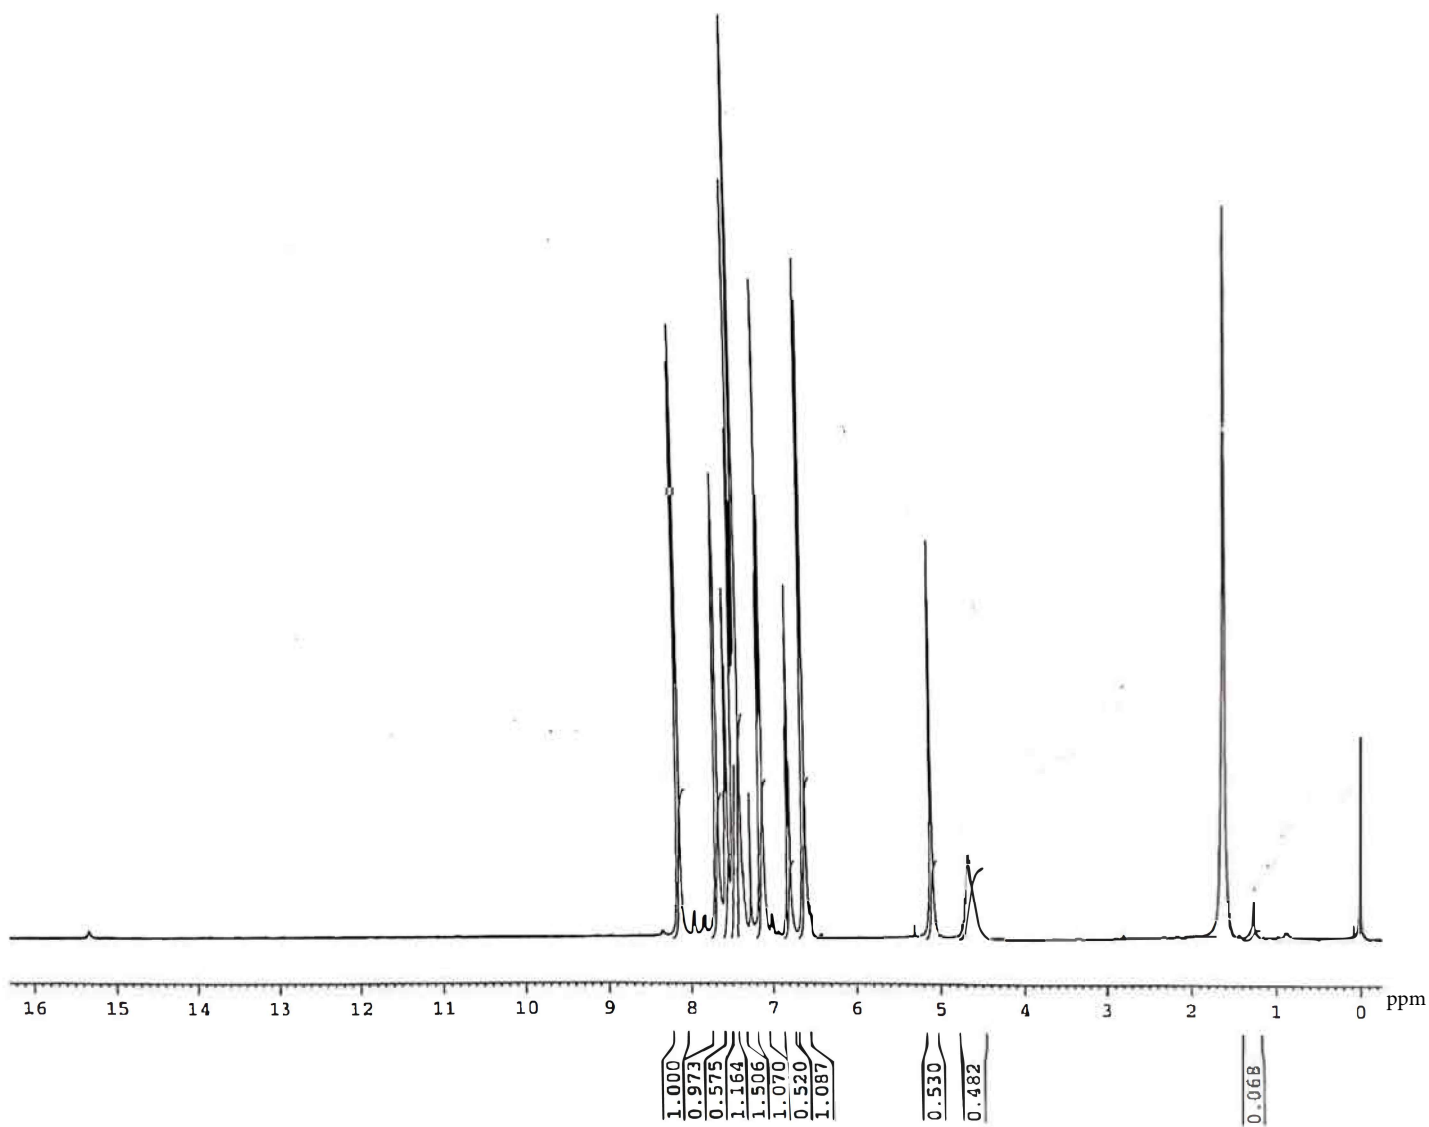

$^1\text{H}$  NMR of 2-hydroxy-2,5-diphenyl-4-(phenylamino)furan-3(2H)-one (5)



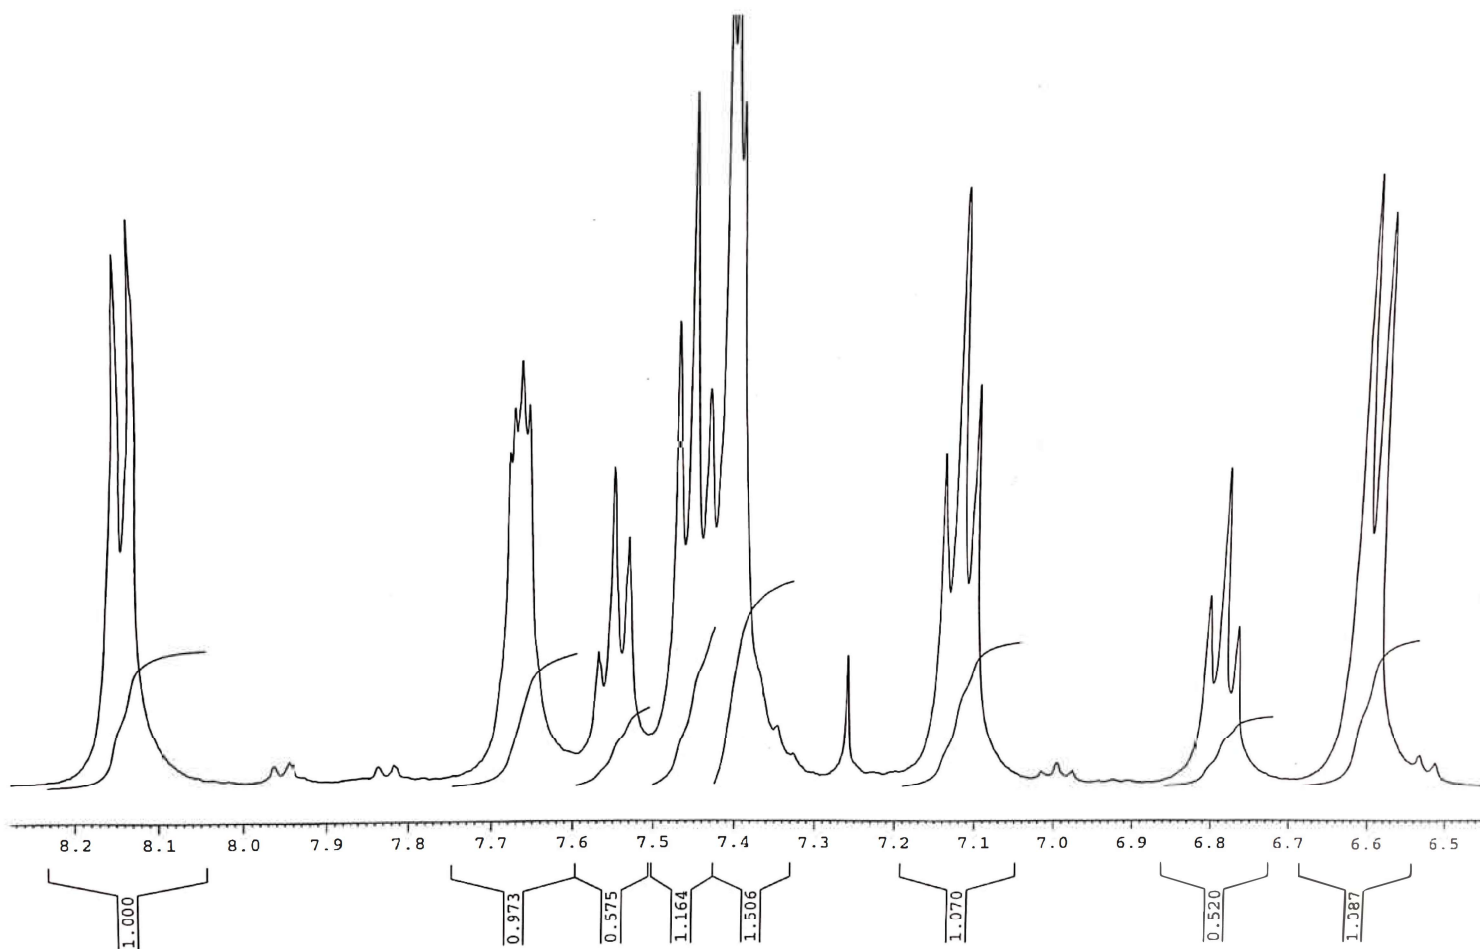

<sup>1</sup>H NMR of 2-hydroxy-2,5-diphenyl-4-(phenylamino)furan-3(2H)-one (5): Expanded

<sup>1</sup>H NMR of 2-hydroxy-2,5-diphenyl-4-(phenylamino)furan-3(2H)-one (5)

| #  | ADDRESS | FREQUENCY |        | INTENSITY |
|----|---------|-----------|--------|-----------|
|    |         | [Hz]      | [PPM]  |           |
| 1  | 15573.0 | 3262.249  | 8.1529 | 14.37     |
| 2  | 15608.3 | 3254.864  | 8.1344 | 15.33     |
| 3  | 15936.4 | 3186.293  | 7.9631 | 0.55      |
| 4  | 15971.7 | 3178.908  | 7.9446 | 0.66      |
| 5  | 16180.7 | 3135.225  | 7.8354 | 0.51      |
| 6  | 16215.8 | 3127.876  | 7.8171 | 0.56      |
| 7  | 16481.4 | 3072.361  | 7.6783 | 9.16      |
| 8  | 16492.7 | 3070.004  | 7.6724 | 10.33     |
| 9  | 16509.8 | 3066.431  | 7.6635 | 11.65     |
| 10 | 16525.7 | 3063.104  | 7.6552 | 10.44     |
| 11 | 16612.9 | 3044.889  | 7.6097 | 0.93      |
| 12 | 16640.8 | 3039.059  | 7.5951 | 0.84      |
| 13 | 16691.0 | 3028.558  | 7.5689 | 3.66      |
| 14 | 16726.3 | 3021.169  | 7.5504 | 8.78      |
| 15 | 16761.6 | 3013.800  | 7.5320 | 6.84      |
| 16 | 16877.3 | 2989.625  | 7.4716 | 12.76     |
| 17 | 16914.6 | 2981.828  | 7.4521 | 18.79     |
| 18 | 16950.5 | 2974.322  | 7.4333 | 10.97     |
| 19 | 16993.0 | 2965.433  | 7.4111 | 22.33     |
| 20 | 17006.4 | 2962.628  | 7.4041 | 22.69     |
| 21 | 17022.7 | 2959.227  | 7.3956 | 18.54     |
| 22 | 17115.6 | 2939.795  | 7.3470 | 1.64      |
| 23 | 17152.9 | 2932.007  | 7.3276 | 0.85      |
| 24 | 17192.2 | 2923.804  | 7.3071 | 0.35      |
| 25 | 17201.7 | 2921.810  | 7.3021 | 0.34      |
| 26 | 17281.1 | 2905.214  | 7.2606 | 3.61      |
| 27 | 17337.2 | 2893.494  | 7.2313 | 0.35      |
| 28 | 17346.1 | 2891.625  | 7.2266 | 0.36      |
| 29 | 17357.8 | 2889.178  | 7.2205 | 0.34      |
| 30 | 17368.3 | 2886.989  | 7.2150 | 0.30      |
| 31 | 17385.7 | 2883.353  | 7.2060 | 0.37      |
| 32 | 17398.6 | 2880.642  | 7.1992 | 0.38      |
| 33 | 17504.5 | 2858.524  | 7.1439 | 9.23      |
| 34 | 17543.0 | 2850.471  | 7.1238 | 16.34     |
| 35 | 17579.8 | 2842.783  | 7.1046 | 11.09     |
| 36 | 17680.9 | 2821.642  | 7.0517 | 0.36      |
| 37 | 17686.3 | 2820.521  | 7.0489 | 0.32      |
| 38 | 17748.6 | 2807.488  | 7.0164 | 0.36      |
| 39 | 17787.6 | 2799.351  | 6.9960 | 0.59      |
| 40 | 17824.0 | 2791.742  | 6.9770 | 0.37      |
| 41 | 18145.1 | 2724.618  | 6.8093 | 5.30      |
| 42 | 18180.1 | 2717.304  | 6.7910 | 8.84      |
| 43 | 18215.1 | 2709.981  | 6.7727 | 4.43      |
| 44 | 18291.7 | 2693.976  | 6.7327 | 0.32      |
| 45 | 18515.6 | 2647.170  | 6.6157 | 16.86     |
| 46 | 18552.9 | 2639.383  | 6.5962 | 15.84     |
| 47 | 18671.5 | 2614.575  | 6.5342 | 0.80      |
| 48 | 18708.6 | 2606.820  | 6.5149 | 0.59      |
| 49 | 21037.6 | 2120.008  | 5.2982 | 0.32      |
| 50 | 21408.3 | 2042.536  | 5.1046 | 9.92      |
| 51 | 22248.8 | 1866.837  | 4.6655 | 2.13      |
| 52 | 22349.4 | 1845.803  | 4.6130 | 1.27      |
| 53 | 22396.8 | 1835.905  | 4.5882 | 0.88      |
| 54 | 22463.7 | 1821.921  | 4.5533 | 0.45      |

|    |         |         |         |       |
|----|---------|---------|---------|-------|
| 55 | 27871.6 | 691.534 | 1.7283  | 0.31  |
| 56 | 28061.6 | 651.826 | 1.6290  | 17.89 |
| 57 | 28236.2 | 615.338 | 1.5378  | 0.43  |
| 58 | 28735.3 | 511.005 | 1.2771  | 0.33  |
| 59 | 28771.7 | 503.403 | 1.2581  | 0.93  |
| 60 | 31039.9 | 29.279  | 0.0732  | 0.32  |
| 61 | 31174.8 | 1.097   | 0.0027  | 5.04  |
| 62 | 31215.1 | -7.344  | -0.0184 | 0.31  |

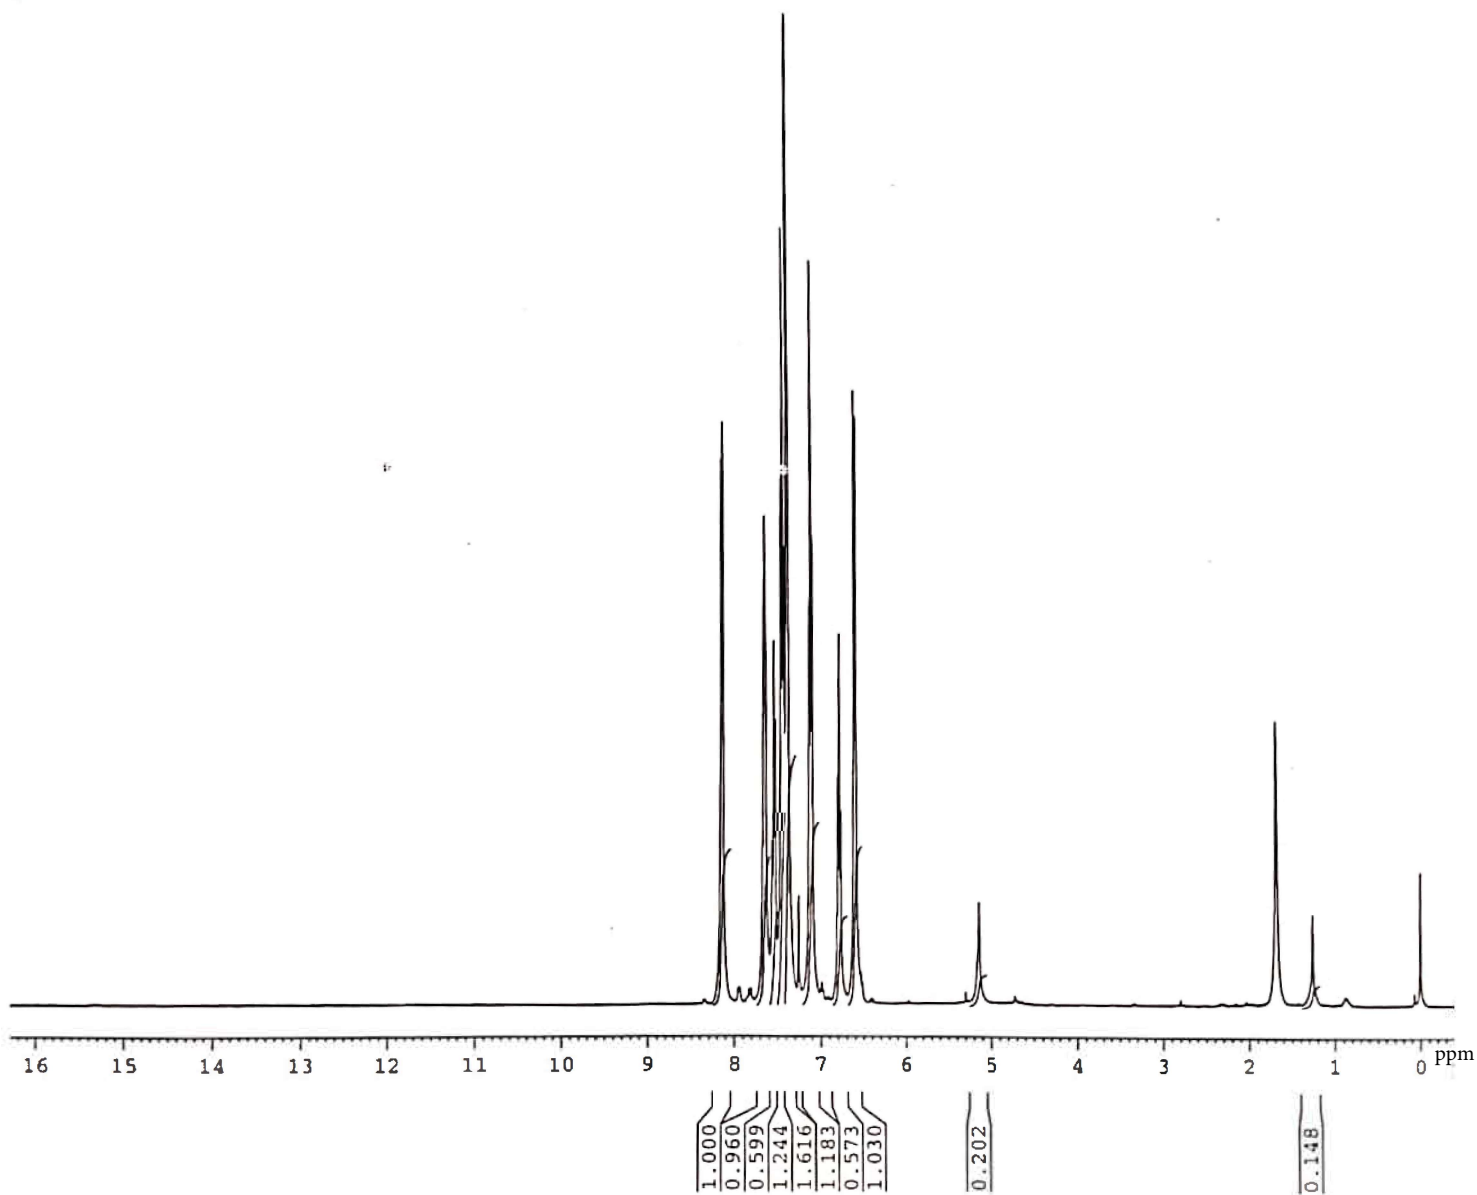

<sup>1</sup>H NMR of 2-hydroxy-2,5-diphenyl-4-(phenylamino)furan-3(2H)-one (5) (D<sub>2</sub>O exchanged)

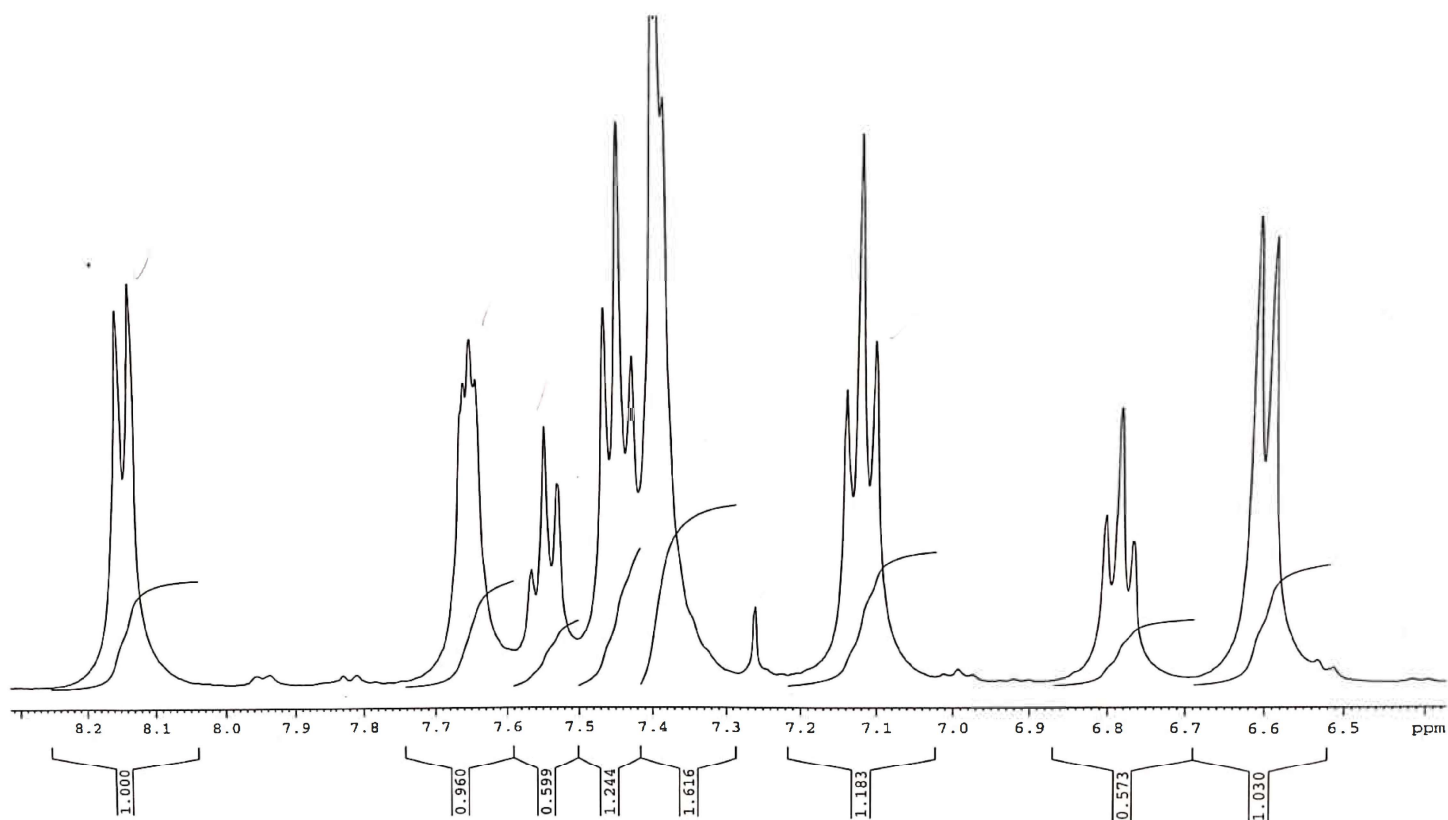

$^1\text{H}$  NMR of 2-hydroxy-2,5-diphenyl-4-(phenylamino)furan-3(2H)-one (5) ( $\text{D}_2\text{O}$  exchanged): Expanded

<sup>1</sup>H NMR of 2-hydroxy-2,5-diphenyl-4-(phenylamino)furan-3(2H)-one (5) (D2O exchanged): Expanded

| #  | ADDRESS | FREQUENCY |        | INTENSITY |
|----|---------|-----------|--------|-----------|
|    |         | [Hz]      | [PPM]  |           |
| 1  | 15566.6 | 3263.589  | 8.1562 | 12.48     |
| 2  | 15603.5 | 3255.862  | 8.1369 | 13.35     |
| 3  | 15950.5 | 3183.349  | 7.9557 | 0.35      |
| 4  | 15983.8 | 3176.382  | 7.9383 | 0.38      |
| 5  | 16193.0 | 3132.656  | 7.8290 | 0.33      |
| 6  | 16229.8 | 3124.962  | 7.8098 | 0.36      |
| 7  | 16515.3 | 3065.280  | 7.6606 | 9.76      |
| 8  | 16532.7 | 3061.638  | 7.6515 | 11.15     |
| 9  | 16547.7 | 3058.513  | 7.6437 | 9.88      |
| 10 | 16649.4 | 3037.244  | 7.5906 | 1.12      |
| 11 | 16697.0 | 3027.309  | 7.5657 | 3.69      |
| 12 | 16731.0 | 3020.200  | 7.5480 | 8.28      |
| 13 | 16764.1 | 3013.274  | 7.5307 | 6.44      |
| 14 | 16766.7 | 3012.726  | 7.5293 | 6.40      |
| 15 | 16887.3 | 2987.518  | 7.4663 | 12.05     |
| 16 | 16924.0 | 2979.844  | 7.4471 | 17.76     |
| 17 | 16960.9 | 2972.137  | 7.4278 | 10.47     |
| 18 | 17015.7 | 2960.686  | 7.3992 | 22.44     |
| 19 | 17026.0 | 2958.532  | 7.3938 | 22.65     |
| 20 | 17042.7 | 2955.037  | 7.3851 | 18.46     |
| 21 | 17205.9 | 2920.923  | 7.2999 | 0.46      |
| 22 | 17221.9 | 2917.583  | 7.2915 | 0.40      |
| 23 | 17233.8 | 2915.094  | 7.2853 | 0.36      |
| 24 | 17282.8 | 2904.861  | 7.2597 | 2.45      |
| 25 | 17340.5 | 2892.793  | 7.2296 | 0.32      |
| 26 | 17348.1 | 2891.198  | 7.2256 | 0.34      |
| 27 | 17388.9 | 2882.670  | 7.2043 | 0.36      |
| 28 | 17393.8 | 2881.644  | 7.2017 | 0.36      |
| 29 | 17514.6 | 2856.403  | 7.1386 | 9.22      |
| 30 | 17550.8 | 2848.848  | 7.1197 | 17.03     |
| 31 | 17587.3 | 2841.214  | 7.1007 | 10.71     |
| 32 | 17759.9 | 2805.130  | 7.0105 | 0.32      |
| 33 | 17793.5 | 2798.109  | 6.9929 | 0.48      |
| 34 | 17830.9 | 2790.295  | 6.9734 | 0.31      |
| 35 | 18083.8 | 2737.434  | 6.8413 | 0.39      |
| 36 | 18155.7 | 2722.393  | 6.8037 | 5.16      |
| 37 | 18190.2 | 2715.191  | 6.7857 | 8.44      |
| 38 | 18223.1 | 2708.312  | 6.7685 | 4.37      |
| 39 | 18518.0 | 2646.674  | 6.6145 | 14.07     |
| 40 | 18557.6 | 2638.401  | 6.5938 | 13.50     |
| 41 | 18655.1 | 2618.011  | 6.5428 | 0.66      |
| 42 | 18671.5 | 2614.594  | 6.5343 | 0.71      |
| 43 | 18711.4 | 2606.244  | 6.5134 | 0.48      |
| 44 | 21345.6 | 2055.636  | 5.1374 | 2.33      |
| 45 | 27959.9 | 673.087   | 1.6822 | 6.46      |
| 46 | 28699.9 | 518.410   | 1.2956 | 0.33      |
| 47 | 28722.1 | 513.769   | 1.2840 | 0.46      |
| 48 | 28774.0 | 502.907   | 1.2568 | 2.06      |
| 49 | 28822.6 | 492.761   | 1.2315 | 0.36      |
| 50 | 31177.2 | 0.589     | 0.0015 | 3.04      |



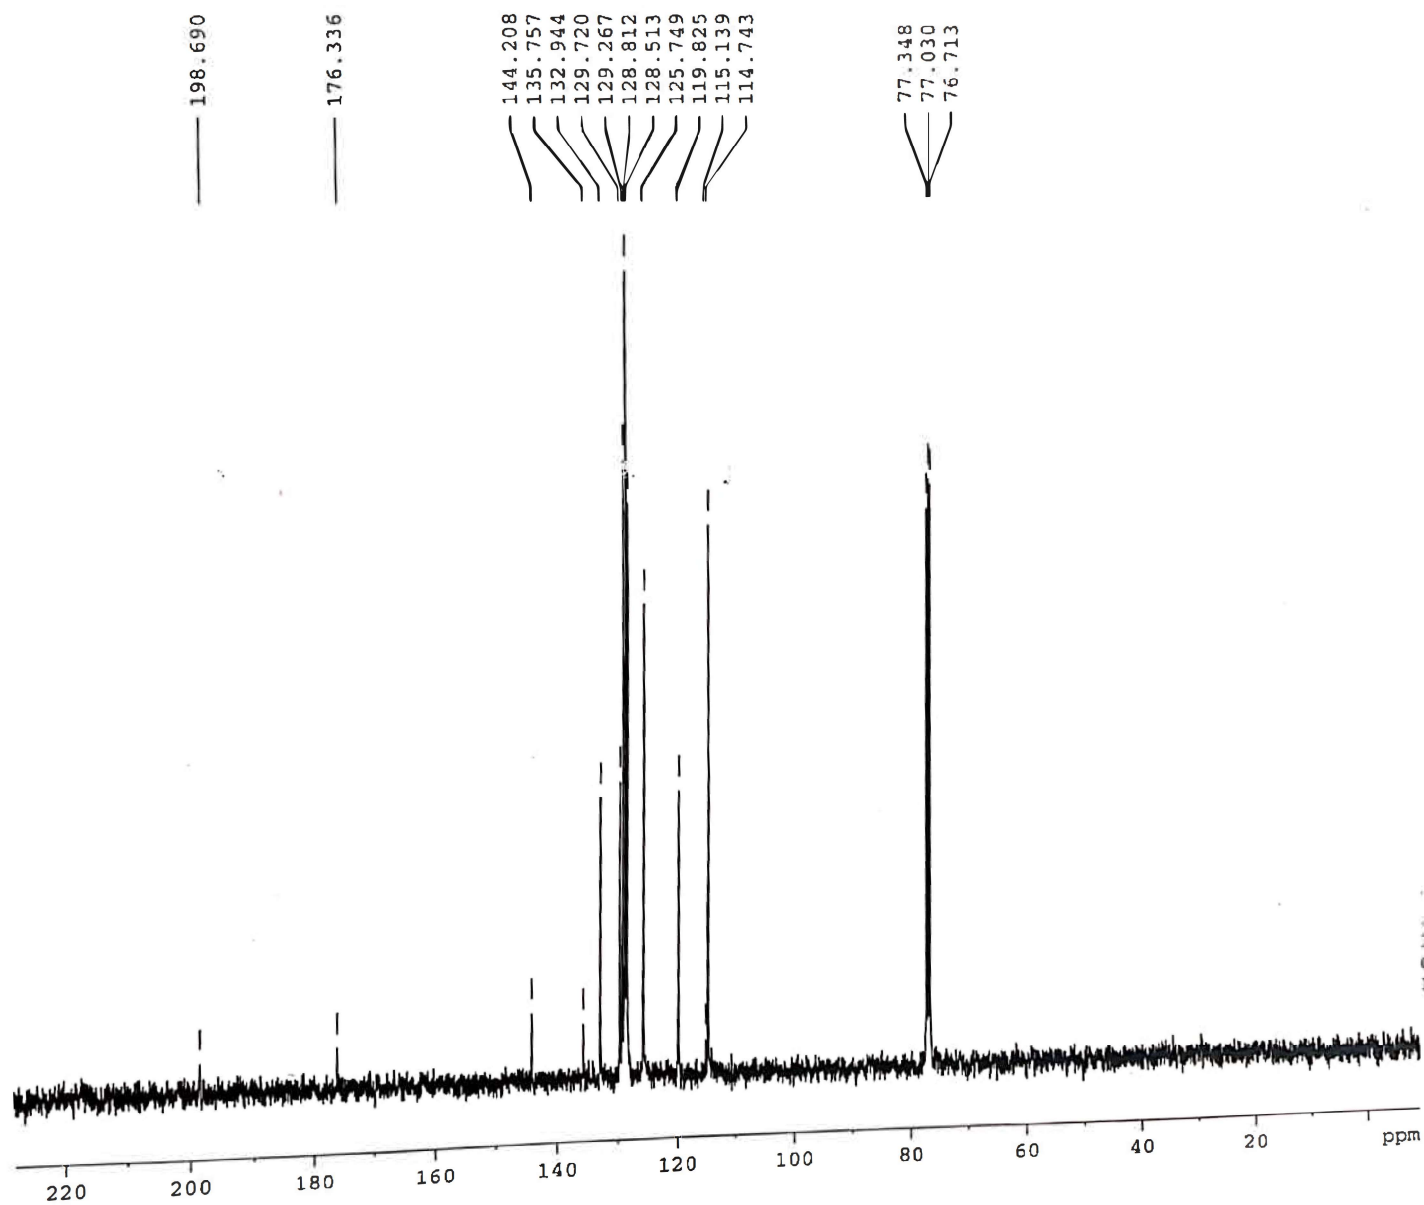

<sup>13</sup>C NMR of 2-hydroxy-2,5-diphenyl-4-(phenylamino)furan-3(2H)-one (5)

**Single crystal XRD data of 2-hydroxy-2,5-diphenyl-4-(phenylamino)furan-3(2*H*)-one (5) (CCDC number: 1469915)**

Table 1. Crystal data and structure refinement for p10208.

|                                   |                                                  |          |
|-----------------------------------|--------------------------------------------------|----------|
| Identification code               | p10208                                           |          |
| Empirical formula                 | C <sub>22</sub> H <sub>17</sub> N O <sub>3</sub> |          |
| Formula weight                    | 343.37                                           |          |
| Temperature                       | 100(2) K                                         |          |
| Wavelength                        | 0.71073 Å                                        |          |
| Crystal system                    | Orthorhombic                                     |          |
| Space group                       | Pna2 <sub>1</sub>                                |          |
| Unit cell dimensions              | a = 27.608(2) Å                                  | α = 90°. |
|                                   | b = 5.5963(5) Å                                  | β = 90°. |
|                                   | c = 21.6736(19) Å                                | γ = 90°. |
| Volume                            | 3348.6(5) Å <sup>3</sup>                         |          |
| Z                                 | 8                                                |          |
| Density (calculated)              | 1.362 Mg/m <sup>3</sup>                          |          |
| Absorption coefficient            | 0.091 mm <sup>-1</sup>                           |          |
| F(000)                            | 1440                                             |          |
| Crystal size                      | 0.47 x 0.39 x 0.37 mm <sup>3</sup>               |          |
| Theta range for data collection   | 2.95 to 25.00°.                                  |          |
| Index ranges                      | -32 ≤ h ≤ 32, -6 ≤ k ≤ 6, -25 ≤ l ≤ 24           |          |
| Reflections collected             | 93166                                            |          |
| Independent reflections           | 5857 [R(int) = 0.0755]                           |          |
| Completeness to theta = 25.00°    | 99.9 %                                           |          |
| Absorption correction             | Semi-empirical from equivalents                  |          |
| Max. and min. transmission        | 0.9671 and 0.9582                                |          |
| Refinement method                 | Full-matrix least-squares on F <sup>2</sup>      |          |
| Data / restraints / parameters    | 5857 / 1 / 439                                   |          |
| Goodness-of-fit on F <sup>2</sup> | 1.152                                            |          |
| Final R indices [I > 2σ(I)]       | R1 = 0.0902, wR2 = 0.2349                        |          |
| R indices (all data)              | R1 = 0.0925, wR2 = 0.2365                        |          |
| Absolute structure parameter      | -0.2(19)                                         |          |
| Largest diff. peak and hole       | 0.934 and -0.546 e.Å <sup>-3</sup>               |          |

Table 2. Atomic coordinates ( $\times 10^4$ ) and equivalent isotropic displacement parameters ( $\text{\AA}^2 \times 10^3$ ) for sp10208. U(eq) is defined as one third of the trace of the orthogonalized  $U^{ij}$  tensor.

|       | x       | y         | z        | U(eq) |
|-------|---------|-----------|----------|-------|
| O(1)  | 2946(1) | -216(6)   | 6528(2)  | 12(1) |
| O(2)  | 3882(1) | 2689(6)   | 5736(2)  | 9(1)  |
| O(3)  | 3682(1) | -2037(7)  | 6336(2)  | 17(1) |
| O(4)  | 336(1)  | 5724(7)   | 9247(2)  | 14(1) |
| N(1)  | 2929(2) | 4218(7)   | 5294(2)  | 12(1) |
| C(1)  | 3469(2) | 135(10)   | 6471(2)  | 12(1) |
| C(2)  | 3504(2) | 1949(10)  | 5946(2)  | 13(1) |
| C(3)  | 3018(2) | 2539(9)   | 5753(2)  | 11(1) |
| C(4)  | 2715(2) | 1203(9)   | 6111(2)  | 11(1) |
| C(5)  | 3671(2) | 1144(10)  | 7063(2)  | 14(1) |
| C(6)  | 3451(2) | 3141(12)  | 7325(3)  | 23(1) |
| C(7)  | 3667(2) | 4265(11)  | 7846(3)  | 25(1) |
| C(8)  | 4074(2) | 3292(12)  | 8096(3)  | 22(1) |
| C(9)  | 4290(2) | 1283(12)  | 7845(3)  | 23(1) |
| C(10) | 4085(2) | 228(12)   | 7320(3)  | 22(1) |
| C(11) | 2730(2) | 3736(10)  | 4708(2)  | 12(1) |
| C(12) | 2784(2) | 5489(11)  | 4255(3)  | 16(1) |
| C(13) | 2581(2) | 5152(10)  | 3676(3)  | 18(1) |
| C(14) | 2329(2) | 3084(12)  | 3544(3)  | 21(1) |
| C(15) | 2289(2) | 1332(10)  | 3981(3)  | 16(1) |
| C(16) | 2492(2) | 1650(10)  | 4584(3)  | 16(1) |
| C(17) | 2185(2) | 1007(9)   | 6134(3)  | 12(1) |
| C(18) | 1888(2) | 2732(10)  | 5871(2)  | 13(1) |
| C(19) | 1391(2) | 2497(10)  | 5914(2)  | 15(1) |
| C(20) | 1190(2) | 481(12)   | 6189(3)  | 22(1) |
| C(21) | 1485(2) | -1266(12) | 6432(3)  | 22(1) |
| C(22) | 1983(2) | -997(10)  | 6412(3)  | 15(1) |
| N(2)  | 333(1)  | 1405(7)   | 10505(2) | 8(1)  |
| O(5)  | 1309(1) | 2969(6)   | 10062(2) | 10(1) |
| O(6)  | 1051(1) | 7714(6)   | 9486(2)  | 14(1) |
| C(23) | 868(2)  | 5508(9)   | 9325(2)  | 10(1) |
| C(24) | 914(2)  | 3680(9)   | 9843(2)  | 10(1) |

|       |          |          |          |       |
|-------|----------|----------|----------|-------|
| C(25) | 438(2)   | 2989(9)  | 10031(2) | 9(1)  |
| C(26) | 124(2)   | 4235(9)  | 9655(2)  | 10(1) |
| C(27) | 1077(2)  | 4685(9)  | 8722(2)  | 11(1) |
| C(28) | 917(2)   | 2612(10) | 8444(3)  | 16(1) |
| C(29) | 1128(2)  | 1856(11) | 7896(3)  | 23(1) |
| C(30) | 1493(2)  | 3165(12) | 7628(3)  | 21(1) |
| C(31) | 1652(2)  | 5249(11) | 7906(3)  | 22(1) |
| C(32) | 1447(2)  | 6007(12) | 8455(3)  | 22(1) |
| C(33) | 119(2)   | 2017(10) | 11079(2) | 13(1) |
| C(34) | 160(2)   | 404(10)  | 11557(3) | 17(1) |
| C(35) | -66(2)   | 920(10)  | 12124(3) | 17(1) |
| C(36) | -322(2)  | 2992(11) | 12204(3) | 20(1) |
| C(37) | -351(2)  | 4629(11) | 11729(3) | 16(1) |
| C(38) | -131(2)  | 4140(10) | 11162(2) | 13(1) |
| C(39) | -410(2)  | 4245(9)  | 9621(2)  | 11(1) |
| C(40) | -672(2)  | 2397(10) | 9849(2)  | 13(1) |
| C(41) | -1174(2) | 2397(10) | 9788(2)  | 13(1) |
| C(42) | -1410(2) | 4292(11) | 9492(3)  | 20(1) |
| C(43) | -1143(2) | 6157(10) | 9260(3)  | 19(1) |
| C(44) | -640(2)  | 6153(10) | 9324(3)  | 16(1) |

---

Table 3. Bond lengths [Å] and angles [°] for sp10208 .

---

|              |          |
|--------------|----------|
| O(1)-C(4)    | 1.363(6) |
| O(1)-C(1)    | 1.461(6) |
| O(2)-C(2)    | 1.211(6) |
| O(3)-C(1)    | 1.381(6) |
| O(3)-H(3A)   | 0.8400   |
| O(4)-C(26)   | 1.347(6) |
| O(4)-C(23)   | 1.484(6) |
| N(1)-C(3)    | 1.391(7) |
| N(1)-C(11)   | 1.410(7) |
| N(1)-H(1A)   | 0.8800   |
| C(1)-C(5)    | 1.510(7) |
| C(1)-C(2)    | 1.528(7) |
| C(2)-C(3)    | 1.444(7) |
| C(3)-C(4)    | 1.364(7) |
| C(4)-C(17)   | 1.466(7) |
| C(5)-C(10)   | 1.372(8) |
| C(5)-C(6)    | 1.393(8) |
| C(6)-C(7)    | 1.424(8) |
| C(6)-H(6A)   | 0.9500   |
| C(7)-C(8)    | 1.361(9) |
| C(7)-H(7A)   | 0.9500   |
| C(8)-C(9)    | 1.384(9) |
| C(8)-H(8A)   | 0.9500   |
| C(9)-C(10)   | 1.400(9) |
| C(9)-H(9A)   | 0.9500   |
| C(10)-H(10A) | 0.9500   |
| C(11)-C(16)  | 1.366(8) |
| C(11)-C(12)  | 1.396(8) |
| C(12)-C(13)  | 1.388(8) |
| C(12)-H(12A) | 0.9500   |
| C(13)-C(14)  | 1.380(9) |
| C(13)-H(13A) | 0.9500   |
| C(14)-C(15)  | 1.368(8) |
| C(14)-H(14A) | 0.9500   |
| C(15)-C(16)  | 1.433(8) |
| C(15)-H(15A) | 0.9500   |

|              |          |
|--------------|----------|
| C(16)-H(16A) | 0.9500   |
| C(17)-C(18)  | 1.389(8) |
| C(17)-C(22)  | 1.390(8) |
| C(18)-C(19)  | 1.380(7) |
| C(18)-H(18A) | 0.9500   |
| C(19)-C(20)  | 1.391(9) |
| C(19)-H(19A) | 0.9500   |
| C(20)-C(21)  | 1.378(9) |
| C(20)-H(20A) | 0.9500   |
| C(21)-C(22)  | 1.383(8) |
| C(21)-H(21A) | 0.9500   |
| C(22)-H(22A) | 0.9500   |
| N(2)-C(25)   | 1.387(7) |
| N(2)-C(33)   | 1.418(7) |
| N(2)-H(2A)   | 0.8800   |
| O(5)-C(24)   | 1.255(6) |
| O(6)-C(23)   | 1.379(6) |
| O(6)-H(6B)   | 0.8400   |
| C(23)-C(27)  | 1.501(7) |
| C(23)-C(24)  | 1.524(7) |
| C(24)-C(25)  | 1.430(7) |
| C(25)-C(26)  | 1.377(7) |
| C(26)-C(39)  | 1.476(7) |
| C(27)-C(28)  | 1.380(8) |
| C(27)-C(32)  | 1.387(8) |
| C(28)-C(29)  | 1.388(8) |
| C(28)-H(28A) | 0.9500   |
| C(29)-C(30)  | 1.375(9) |
| C(29)-H(29A) | 0.9500   |
| C(30)-C(31)  | 1.384(9) |
| C(30)-H(30A) | 0.9500   |
| C(31)-C(32)  | 1.386(8) |
| C(31)-H(31A) | 0.9500   |
| C(32)-H(32A) | 0.9500   |
| C(33)-C(34)  | 1.379(8) |
| C(33)-C(38)  | 1.385(7) |
| C(34)-C(35)  | 1.409(8) |
| C(34)-H(34A) | 0.9500   |
| C(35)-C(36)  | 1.369(9) |



|                  |          |
|------------------|----------|
| C(35)-H(35A)     | 0.9500   |
| C(36)-C(37)      | 1.381(8) |
| C(36)-H(36A)     | 0.9500   |
| C(37)-C(38)      | 1.397(8) |
| C(37)-H(37A)     | 0.9500   |
| C(38)-H(38A)     | 0.9500   |
| C(39)-C(40)      | 1.356(8) |
| C(39)-C(44)      | 1.400(8) |
| C(40)-C(41)      | 1.391(7) |
| C(40)-H(40A)     | 0.9500   |
| C(41)-C(42)      | 1.401(8) |
| C(41)-H(41A)     | 0.9500   |
| C(42)-C(43)      | 1.373(9) |
| C(42)-H(42A)     | 0.9500   |
| C(43)-C(44)      | 1.394(8) |
| C(43)-H(43A)     | 0.9500   |
| C(44)-H(44A)     | 0.9500   |
| C(4)-O(1)-C(1)   | 109.2(4) |
| C(1)-O(3)-H(3A)  | 109.5    |
| C(26)-O(4)-C(23) | 107.7(4) |
| C(3)-N(1)-C(11)  | 125.8(4) |
| C(3)-N(1)-H(1A)  | 117.1    |
| C(11)-N(1)-H(1A) | 117.1    |
| O(3)-C(1)-O(1)   | 108.6(4) |
| O(3)-C(1)-C(5)   | 110.6(4) |
| O(1)-C(1)-C(5)   | 110.1(4) |
| O(3)-C(1)-C(2)   | 113.6(4) |
| O(1)-C(1)-C(2)   | 102.4(4) |
| C(5)-C(1)-C(2)   | 111.2(4) |
| O(2)-C(2)-C(3)   | 127.9(5) |
| O(2)-C(2)-C(1)   | 124.1(5) |
| C(3)-C(2)-C(1)   | 107.9(4) |
| C(4)-C(3)-N(1)   | 131.9(5) |
| C(4)-C(3)-C(2)   | 106.3(5) |
| N(1)-C(3)-C(2)   | 121.7(4) |
| O(1)-C(4)-C(3)   | 114.1(4) |
| O(1)-C(4)-C(17)  | 113.7(4) |
| C(3)-C(4)-C(17)  | 132.2(5) |
| C(10)-C(5)-C(6)  | 119.9(5) |

|                    |          |
|--------------------|----------|
| C(10)-C(5)-C(1)    | 120.9(5) |
| C(6)-C(5)-C(1)     | 119.1(5) |
| C(5)-C(6)-C(7)     | 119.7(5) |
| C(5)-C(6)-H(6A)    | 120.2    |
| C(7)-C(6)-H(6A)    | 120.2    |
| C(8)-C(7)-C(6)     | 119.0(5) |
| C(8)-C(7)-H(7A)    | 120.5    |
| C(6)-C(7)-H(7A)    | 120.5    |
| C(7)-C(8)-C(9)     | 121.6(5) |
| C(7)-C(8)-H(8A)    | 119.2    |
| C(9)-C(8)-H(8A)    | 119.2    |
| C(8)-C(9)-C(10)    | 119.2(5) |
| C(8)-C(9)-H(9A)    | 120.4    |
| C(10)-C(9)-H(9A)   | 120.4    |
| C(5)-C(10)-C(9)    | 120.6(6) |
| C(5)-C(10)-H(10A)  | 119.7    |
| C(9)-C(10)-H(10A)  | 119.7    |
| C(16)-C(11)-C(12)  | 121.0(5) |
| C(16)-C(11)-N(1)   | 121.8(5) |
| C(12)-C(11)-N(1)   | 117.2(5) |
| C(13)-C(12)-C(11)  | 119.8(5) |
| C(13)-C(12)-H(12A) | 120.1    |
| C(11)-C(12)-H(12A) | 120.1    |
| C(14)-C(13)-C(12)  | 120.3(6) |
| C(14)-C(13)-H(13A) | 119.9    |
| C(12)-C(13)-H(13A) | 119.9    |
| C(15)-C(14)-C(13)  | 119.9(6) |
| C(15)-C(14)-H(14A) | 120.1    |
| C(13)-C(14)-H(14A) | 120.1    |
| C(14)-C(15)-C(16)  | 120.7(6) |
| C(14)-C(15)-H(15A) | 119.6    |
| C(16)-C(15)-H(15A) | 119.6    |
| C(11)-C(16)-C(15)  | 118.2(5) |
| C(11)-C(16)-H(16A) | 120.9    |
| C(15)-C(16)-H(16A) | 120.9    |
| C(18)-C(17)-C(22)  | 120.1(5) |
| C(18)-C(17)-C(4)   | 121.5(5) |
| C(22)-C(17)-C(4)   | 118.4(5) |
| C(19)-C(18)-C(17)  | 119.5(5) |

|                    |          |
|--------------------|----------|
| C(19)-C(18)-H(18A) | 120.2    |
| C(17)-C(18)-H(18A) | 120.2    |
| C(18)-C(19)-C(20)  | 120.2(5) |
| C(18)-C(19)-H(19A) | 119.9    |
| C(20)-C(19)-H(19A) | 119.9    |
| C(21)-C(20)-C(19)  | 120.2(5) |
| C(21)-C(20)-H(20A) | 119.9    |
| C(19)-C(20)-H(20A) | 119.9    |
| C(20)-C(21)-C(22)  | 119.9(5) |
| C(20)-C(21)-H(21A) | 120.0    |
| C(22)-C(21)-H(21A) | 120.0    |
| C(21)-C(22)-C(17)  | 120.0(5) |
| C(21)-C(22)-H(22A) | 120.0    |
| C(17)-C(22)-H(22A) | 120.0    |
| C(25)-N(2)-C(33)   | 125.6(4) |
| C(25)-N(2)-H(2A)   | 117.2    |
| C(33)-N(2)-H(2A)   | 117.2    |
| C(23)-O(6)-H(6B)   | 109.5    |
| O(6)-C(23)-O(4)    | 108.6(4) |
| O(6)-C(23)-C(27)   | 110.7(4) |
| O(4)-C(23)-C(27)   | 107.9(4) |
| O(6)-C(23)-C(24)   | 112.6(4) |
| O(4)-C(23)-C(24)   | 102.8(4) |
| C(27)-C(23)-C(24)  | 113.8(4) |
| O(5)-C(24)-C(25)   | 127.3(5) |
| O(5)-C(24)-C(23)   | 124.3(4) |
| C(25)-C(24)-C(23)  | 108.4(4) |
| C(26)-C(25)-N(2)   | 129.1(4) |
| C(26)-C(25)-C(24)  | 105.7(4) |
| N(2)-C(25)-C(24)   | 125.2(4) |
| O(4)-C(26)-C(25)   | 115.5(4) |
| O(4)-C(26)-C(39)   | 113.4(4) |
| C(25)-C(26)-C(39)  | 131.1(5) |
| C(28)-C(27)-C(32)  | 120.1(5) |
| C(28)-C(27)-C(23)  | 121.0(5) |
| C(32)-C(27)-C(23)  | 118.8(5) |
| C(27)-C(28)-C(29)  | 119.8(5) |
| C(27)-C(28)-H(28A) | 120.1    |
| C(29)-C(28)-H(28A) | 120.1    |

|                    |          |
|--------------------|----------|
| C(30)-C(29)-C(28)  | 120.3(5) |
| C(30)-C(29)-H(29A) | 119.8    |
| C(28)-C(29)-H(29A) | 119.8    |
| C(29)-C(30)-C(31)  | 119.9(5) |
| C(29)-C(30)-H(30A) | 120.1    |
| C(31)-C(30)-H(30A) | 120.1    |
| C(30)-C(31)-C(32)  | 120.1(5) |
| C(30)-C(31)-H(31A) | 119.9    |
| C(32)-C(31)-H(31A) | 119.9    |
| C(31)-C(32)-C(27)  | 119.7(6) |
| C(31)-C(32)-H(32A) | 120.1    |
| C(27)-C(32)-H(32A) | 120.1    |
| C(34)-C(33)-C(38)  | 120.3(5) |
| C(34)-C(33)-N(2)   | 117.8(5) |
| C(38)-C(33)-N(2)   | 121.9(5) |
| C(33)-C(34)-C(35)  | 119.0(5) |
| C(33)-C(34)-H(34A) | 120.5    |
| C(35)-C(34)-H(34A) | 120.5    |
| C(36)-C(35)-C(34)  | 120.9(5) |
| C(36)-C(35)-H(35A) | 119.5    |
| C(34)-C(35)-H(35A) | 119.5    |
| C(35)-C(36)-C(37)  | 119.8(5) |
| C(35)-C(36)-H(36A) | 120.1    |
| C(37)-C(36)-H(36A) | 120.1    |
| C(36)-C(37)-C(38)  | 120.1(5) |
| C(36)-C(37)-H(37A) | 119.9    |
| C(38)-C(37)-H(37A) | 119.9    |
| C(33)-C(38)-C(37)  | 119.9(5) |
| C(33)-C(38)-H(38A) | 120.0    |
| C(37)-C(38)-H(38A) | 120.0    |
| C(40)-C(39)-C(44)  | 120.4(5) |
| C(40)-C(39)-C(26)  | 120.8(5) |
| C(44)-C(39)-C(26)  | 118.6(5) |
| C(39)-C(40)-C(41)  | 119.8(5) |
| C(39)-C(40)-H(40A) | 120.1    |
| C(41)-C(40)-H(40A) | 120.1    |
| C(40)-C(41)-C(42)  | 120.5(5) |
| C(40)-C(41)-H(41A) | 119.8    |
| C(42)-C(41)-H(41A) | 119.8    |

|                    |          |
|--------------------|----------|
| C(43)-C(42)-C(41)  | 119.5(5) |
| C(43)-C(42)-H(42A) | 120.2    |
| C(41)-C(42)-H(42A) | 120.2    |
| C(42)-C(43)-C(44)  | 119.8(5) |
| C(42)-C(43)-H(43A) | 120.1    |
| C(44)-C(43)-H(43A) | 120.1    |
| C(43)-C(44)-C(39)  | 119.9(5) |
| C(43)-C(44)-H(44A) | 120.0    |
| C(39)-C(44)-H(44A) | 120.0    |

---

Table 4. Anisotropic displacement parameters ( $\text{\AA}^2 \times 10^3$ ) for sp10208. The anisotropic displacement factor exponent takes the form:  $-2\pi^2 [ h^2 a^{*2} U^{11} + \dots + 2 h k a^* b^* U^{12} ]$

|       | $U^{11}$ | $U^{22}$ | $U^{33}$ | $U^{23}$ | $U^{13}$ | $U^{12}$ |
|-------|----------|----------|----------|----------|----------|----------|
| O(1)  | 4(2)     | 13(2)    | 18(2)    | 5(2)     | -2(1)    | 1(1)     |
| O(2)  | 13(2)    | 8(2)     | 8(2)     | 0(1)     | 0(1)     | -1(1)    |
| O(3)  | 18(2)    | 19(2)    | 16(2)    | 3(2)     | 7(2)     | 10(2)    |
| O(4)  | 13(2)    | 16(2)    | 13(2)    | 6(2)     | 2(1)     | 4(2)     |
| N(1)  | 16(2)    | 7(2)     | 11(2)    | 2(2)     | -3(2)    | -1(2)    |
| C(1)  | 3(2)     | 19(3)    | 15(3)    | 0(2)     | -2(2)    | 2(2)     |
| C(2)  | 13(2)    | 19(3)    | 8(2)     | -3(2)    | -3(2)    | 2(2)     |
| C(3)  | 8(2)     | 20(3)    | 6(2)     | 2(2)     | 1(2)     | -6(2)    |
| C(4)  | 11(2)    | 11(2)    | 12(2)    | -5(2)    | 3(2)     | 3(2)     |
| C(5)  | 12(3)    | 24(3)    | 8(3)     | 5(2)     | 0(2)     | -1(2)    |
| C(6)  | 18(3)    | 35(4)    | 15(3)    | -11(3)   | -4(2)    | 4(3)     |
| C(7)  | 26(3)    | 26(3)    | 23(3)    | -9(3)    | -1(3)    | 10(3)    |
| C(8)  | 20(3)    | 31(3)    | 14(3)    | -8(2)    | -8(2)    | 0(3)     |
| C(9)  | 15(3)    | 37(3)    | 18(3)    | 8(3)     | -7(2)    | 4(3)     |
| C(10) | 20(3)    | 32(3)    | 13(3)    | 5(2)     | -2(2)    | 9(3)     |
| C(11) | 5(2)     | 19(3)    | 12(3)    | 0(2)     | -2(2)    | 7(2)     |
| C(12) | 6(2)     | 26(3)    | 17(3)    | 5(2)     | -1(2)    | 0(2)     |
| C(13) | 16(3)    | 20(3)    | 19(3)    | -3(2)    | 5(2)     | 0(2)     |
| C(14) | 17(3)    | 38(3)    | 9(3)     | 4(2)     | 3(2)     | 13(3)    |
| C(15) | 10(2)    | 19(2)    | 19(2)    | -1(2)    | 5(2)     | 3(2)     |
| C(16) | 10(2)    | 19(2)    | 19(2)    | -1(2)    | 5(2)     | 3(2)     |
| C(17) | 9(2)     | 11(2)    | 15(3)    | -4(2)    | 4(2)     | -7(2)    |
| C(18) | 11(2)    | 26(3)    | 3(2)     | -4(2)    | 1(2)     | 3(2)     |
| C(19) | 13(3)    | 23(3)    | 10(3)    | -4(2)    | -2(2)    | 0(2)     |
| C(20) | 8(2)     | 42(4)    | 17(3)    | -11(3)   | 2(2)     | -6(2)    |
| C(21) | 14(3)    | 34(3)    | 17(3)    | -6(3)    | 5(2)     | -14(2)   |
| C(22) | 14(3)    | 16(3)    | 16(3)    | -7(2)    | -2(2)    | -4(2)    |
| N(2)  | 11(2)    | 2(2)     | 11(2)    | -3(2)    | -2(2)    | 1(2)     |
| O(5)  | 8(2)     | 18(2)    | 5(2)     | -3(1)    | 1(1)     | -3(1)    |
| O(6)  | 27(2)    | 9(2)     | 6(2)     | 2(1)     | -3(2)    | -3(2)    |
| C(23) | 7(2)     | 11(2)    | 11(2)    | -1(2)    | -2(1)    | -2(1)    |
| C(24) | 7(2)     | 11(2)    | 11(2)    | -1(2)    | -2(1)    | -2(1)    |
| C(25) | 6(2)     | 10(2)    | 12(3)    | 5(2)     | 0(2)     | -2(2)    |
| C(26) | 7(2)     | 7(2)     | 16(3)    | -4(2)    | 1(2)     | 2(2)     |



|       |       |       |       |       |        |        |
|-------|-------|-------|-------|-------|--------|--------|
| C(27) | 11(2) | 13(2) | 8(2)  | 3(2)  | -5(2)  | 3(2)   |
| C(28) | 15(3) | 24(3) | 10(3) | -1(2) | 2(2)   | -2(2)  |
| C(29) | 32(3) | 26(3) | 10(3) | -4(2) | -10(2) | -1(3)  |
| C(30) | 21(3) | 36(3) | 8(3)  | -5(2) | -1(2)  | 0(3)   |
| C(31) | 17(3) | 31(3) | 19(3) | -1(3) | 6(2)   | -6(3)  |
| C(32) | 14(3) | 34(3) | 17(3) | -2(3) | -4(2)  | -3(2)  |
| C(33) | 6(2)  | 21(2) | 11(2) | -4(2) | -4(1)  | 2(1)   |
| C(34) | 10(2) | 22(2) | 18(2) | 7(2)  | 0(2)   | -10(2) |
| C(35) | 10(2) | 22(2) | 18(2) | 7(2)  | 0(2)   | -10(2) |
| C(36) | 19(3) | 31(3) | 10(3) | -4(2) | 4(2)   | -9(2)  |
| C(37) | 5(2)  | 23(3) | 21(3) | -3(2) | 3(2)   | -4(2)  |
| C(38) | 6(2)  | 21(2) | 11(2) | -4(2) | -4(1)  | 2(1)   |
| C(39) | 8(2)  | 17(3) | 8(2)  | -8(2) | -2(2)  | 4(2)   |
| C(40) | 13(2) | 18(2) | 9(2)  | -1(2) | 2(1)   | 5(2)   |
| C(41) | 13(2) | 18(2) | 9(2)  | -1(2) | 2(1)   | 5(2)   |
| C(42) | 12(3) | 32(3) | 17(3) | 0(2)  | 0(2)   | 7(2)   |
| C(43) | 20(3) | 20(3) | 17(3) | 2(2)  | -6(2)  | 12(2)  |
| C(44) | 10(3) | 23(3) | 16(3) | -4(2) | -2(2)  | 5(2)   |

---

Table 5. Hydrogen coordinates ( $\times 10^4$ ) and isotropic displacement parameters ( $\text{\AA}^2 \times 10^{-3}$ ) for sp10208.

|        | x     | y     | z     | U(eq) |
|--------|-------|-------|-------|-------|
| H(3A)  | 3701  | -2202 | 5952  | 26    |
| H(1A)  | 3003  | 5713  | 5377  | 14    |
| H(6A)  | 3158  | 3749  | 7157  | 27    |
| H(7A)  | 3529  | 5674  | 8017  | 30    |
| H(8A)  | 4213  | 4008  | 8452  | 26    |
| H(9A)  | 4574  | 628   | 8026  | 28    |
| H(10A) | 4235  | -1134 | 7141  | 26    |
| H(12A) | 2960  | 6908  | 4343  | 20    |
| H(13A) | 2616  | 6351  | 3368  | 22    |
| H(14A) | 2184  | 2877  | 3150  | 25    |
| H(15A) | 2125  | -111  | 3884  | 19    |
| H(16A) | 2463  | 441   | 4890  | 19    |
| H(18A) | 2025  | 4062  | 5662  | 16    |
| H(19A) | 1187  | 3716  | 5756  | 18    |
| H(20A) | 848   | 309   | 6209  | 27    |
| H(21A) | 1347  | -2653 | 6613  | 26    |
| H(22A) | 2187  | -2183 | 6588  | 18    |
| H(2A)  | 405   | -108  | 10445 | 10    |
| H(6B)  | 1077  | 7798  | 9872  | 21    |
| H(28A) | 665   | 1705  | 8627  | 19    |
| H(29A) | 1018  | 428   | 7704  | 27    |
| H(30A) | 1636  | 2639  | 7254  | 26    |
| H(31A) | 1902  | 6163  | 7719  | 27    |
| H(32A) | 1559  | 7427  | 8649  | 26    |
| H(34A) | 339   | -1034 | 11504 | 20    |
| H(35A) | -40   | -184  | 12455 | 20    |
| H(36A) | -480  | 3302  | 12586 | 24    |
| H(37A) | -520  | 6089  | 11787 | 20    |
| H(38A) | -153  | 5261  | 10834 | 15    |
| H(40A) | -514  | 1105  | 10050 | 16    |
| H(41A) | -1357 | 1103  | 9949  | 16    |
| H(42A) | -1752 | 4286  | 9451  | 24    |
| H(43A) | -1300 | 7447  | 9058  | 23    |
| H(44A) | -454  | 7444  | 9166  | 20    |

Table 6. Torsion angles [°] for sp10208.

---

|                       |           |
|-----------------------|-----------|
| C(4)-O(1)-C(1)-O(3)   | -121.5(4) |
| C(4)-O(1)-C(1)-C(5)   | 117.3(5)  |
| C(4)-O(1)-C(1)-C(2)   | -1.0(5)   |
| O(3)-C(1)-C(2)-O(2)   | -60.9(7)  |
| O(1)-C(1)-C(2)-O(2)   | -177.8(5) |
| C(5)-C(1)-C(2)-O(2)   | 64.7(7)   |
| O(3)-C(1)-C(2)-C(3)   | 118.2(5)  |
| O(1)-C(1)-C(2)-C(3)   | 1.3(5)    |
| C(5)-C(1)-C(2)-C(3)   | -116.2(5) |
| C(11)-N(1)-C(3)-C(4)  | -68.3(8)  |
| C(11)-N(1)-C(3)-C(2)  | 113.2(6)  |
| O(2)-C(2)-C(3)-C(4)   | 178.0(5)  |
| C(1)-C(2)-C(3)-C(4)   | -1.1(6)   |
| O(2)-C(2)-C(3)-N(1)   | -3.2(9)   |
| C(1)-C(2)-C(3)-N(1)   | 177.8(5)  |
| C(1)-O(1)-C(4)-C(3)   | 0.5(6)    |
| C(1)-O(1)-C(4)-C(17)  | -179.4(4) |
| N(1)-C(3)-C(4)-O(1)   | -178.3(5) |
| C(2)-C(3)-C(4)-O(1)   | 0.4(6)    |
| N(1)-C(3)-C(4)-C(17)  | 1.5(10)   |
| C(2)-C(3)-C(4)-C(17)  | -179.8(5) |
| O(3)-C(1)-C(5)-C(10)  | 14.3(7)   |
| O(1)-C(1)-C(5)-C(10)  | 134.3(5)  |
| C(2)-C(1)-C(5)-C(10)  | -112.9(6) |
| O(3)-C(1)-C(5)-C(6)   | -170.4(5) |
| O(1)-C(1)-C(5)-C(6)   | -50.4(7)  |
| C(2)-C(1)-C(5)-C(6)   | 62.4(6)   |
| C(10)-C(5)-C(6)-C(7)  | 2.1(9)    |
| C(1)-C(5)-C(6)-C(7)   | -173.3(5) |
| C(5)-C(6)-C(7)-C(8)   | -3.1(10)  |
| C(6)-C(7)-C(8)-C(9)   | 2.0(10)   |
| C(7)-C(8)-C(9)-C(10)  | 0.1(10)   |
| C(6)-C(5)-C(10)-C(9)  | 0.0(9)    |
| C(1)-C(5)-C(10)-C(9)  | 175.3(5)  |
| C(8)-C(9)-C(10)-C(5)  | -1.2(9)   |
| C(3)-N(1)-C(11)-C(16) | 16.6(8)   |
| C(3)-N(1)-C(11)-C(12) | -163.5(5) |

|                         |           |
|-------------------------|-----------|
| C(16)-C(11)-C(12)-C(13) | 2.2(8)    |
| N(1)-C(11)-C(12)-C(13)  | -177.7(5) |
| C(11)-C(12)-C(13)-C(14) | -0.6(8)   |
| C(12)-C(13)-C(14)-C(15) | -1.5(8)   |
| C(13)-C(14)-C(15)-C(16) | 2.1(8)    |
| C(12)-C(11)-C(16)-C(15) | -1.6(8)   |
| N(1)-C(11)-C(16)-C(15)  | 178.3(5)  |
| C(14)-C(15)-C(16)-C(11) | -0.5(8)   |
| O(1)-C(4)-C(17)-C(18)   | 162.5(5)  |
| C(3)-C(4)-C(17)-C(18)   | -17.2(9)  |
| O(1)-C(4)-C(17)-C(22)   | -19.4(7)  |
| C(3)-C(4)-C(17)-C(22)   | 160.8(6)  |
| C(22)-C(17)-C(18)-C(19) | 3.2(8)    |
| C(4)-C(17)-C(18)-C(19)  | -178.8(5) |
| C(17)-C(18)-C(19)-C(20) | -3.6(8)   |
| C(18)-C(19)-C(20)-C(21) | 1.6(8)    |
| C(19)-C(20)-C(21)-C(22) | 1.0(8)    |
| C(20)-C(21)-C(22)-C(17) | -1.4(8)   |
| C(18)-C(17)-C(22)-C(21) | -0.7(8)   |
| C(4)-C(17)-C(22)-C(21)  | -178.8(5) |
| C(26)-O(4)-C(23)-O(6)   | -119.9(4) |
| C(26)-O(4)-C(23)-C(27)  | 120.1(4)  |
| C(26)-O(4)-C(23)-C(24)  | -0.4(5)   |
| O(6)-C(23)-C(24)-O(5)   | -62.9(7)  |
| O(4)-C(23)-C(24)-O(5)   | -179.5(5) |
| C(27)-C(23)-C(24)-O(5)  | 64.1(6)   |
| O(6)-C(23)-C(24)-C(25)  | 116.1(5)  |
| O(4)-C(23)-C(24)-C(25)  | -0.5(5)   |
| C(27)-C(23)-C(24)-C(25) | -116.9(5) |
| C(33)-N(2)-C(25)-C(26)  | -68.5(7)  |
| C(33)-N(2)-C(25)-C(24)  | 110.5(6)  |
| O(5)-C(24)-C(25)-C(26)  | -179.8(5) |
| C(23)-C(24)-C(25)-C(26) | 1.2(6)    |
| O(5)-C(24)-C(25)-N(2)   | 1.0(9)    |
| C(23)-C(24)-C(25)-N(2)  | -178.0(5) |
| C(23)-O(4)-C(26)-C(25)  | 1.3(6)    |
| C(23)-O(4)-C(26)-C(39)  | -179.2(4) |
| N(2)-C(25)-C(26)-O(4)   | 177.5(5)  |
| C(24)-C(25)-C(26)-O(4)  | -1.6(6)   |

|                         |           |
|-------------------------|-----------|
| N(2)-C(25)-C(26)-C(39)  | -1.9(10)  |
| C(24)-C(25)-C(26)-C(39) | 178.9(5)  |
| O(6)-C(23)-C(27)-C(28)  | -174.7(4) |
| O(4)-C(23)-C(27)-C(28)  | -56.0(6)  |
| C(24)-C(23)-C(27)-C(28) | 57.3(6)   |
| O(6)-C(23)-C(27)-C(32)  | 7.3(6)    |
| O(4)-C(23)-C(27)-C(32)  | 126.0(5)  |
| C(24)-C(23)-C(27)-C(32) | -120.7(5) |
| C(32)-C(27)-C(28)-C(29) | -0.1(8)   |
| C(23)-C(27)-C(28)-C(29) | -178.1(5) |
| C(27)-C(28)-C(29)-C(30) | -0.1(9)   |
| C(28)-C(29)-C(30)-C(31) | -0.1(9)   |
| C(29)-C(30)-C(31)-C(32) | 0.6(9)    |
| C(30)-C(31)-C(32)-C(27) | -0.8(9)   |
| C(28)-C(27)-C(32)-C(31) | 0.6(8)    |
| C(23)-C(27)-C(32)-C(31) | 178.6(5)  |
| C(25)-N(2)-C(33)-C(34)  | -162.5(5) |
| C(25)-N(2)-C(33)-C(38)  | 18.5(7)   |
| C(38)-C(33)-C(34)-C(35) | 1.6(7)    |
| N(2)-C(33)-C(34)-C(35)  | -177.4(4) |
| C(33)-C(34)-C(35)-C(36) | -0.2(8)   |
| C(34)-C(35)-C(36)-C(37) | -1.5(8)   |
| C(35)-C(36)-C(37)-C(38) | 1.9(8)    |
| C(34)-C(33)-C(38)-C(37) | -1.3(7)   |
| N(2)-C(33)-C(38)-C(37)  | 177.7(5)  |
| C(36)-C(37)-C(38)-C(33) | -0.5(7)   |
| O(4)-C(26)-C(39)-C(40)  | 159.5(5)  |
| C(25)-C(26)-C(39)-C(40) | -21.0(9)  |
| O(4)-C(26)-C(39)-C(44)  | -17.6(7)  |
| C(25)-C(26)-C(39)-C(44) | 161.8(6)  |
| C(44)-C(39)-C(40)-C(41) | -0.1(8)   |
| C(26)-C(39)-C(40)-C(41) | -177.2(5) |
| C(39)-C(40)-C(41)-C(42) | 0.2(8)    |
| C(40)-C(41)-C(42)-C(43) | 0.0(8)    |
| C(41)-C(42)-C(43)-C(44) | -0.2(9)   |
| C(42)-C(43)-C(44)-C(39) | 0.2(8)    |
| C(40)-C(39)-C(44)-C(43) | -0.1(8)   |
| C(26)-C(39)-C(44)-C(43) | 177.1(5)  |

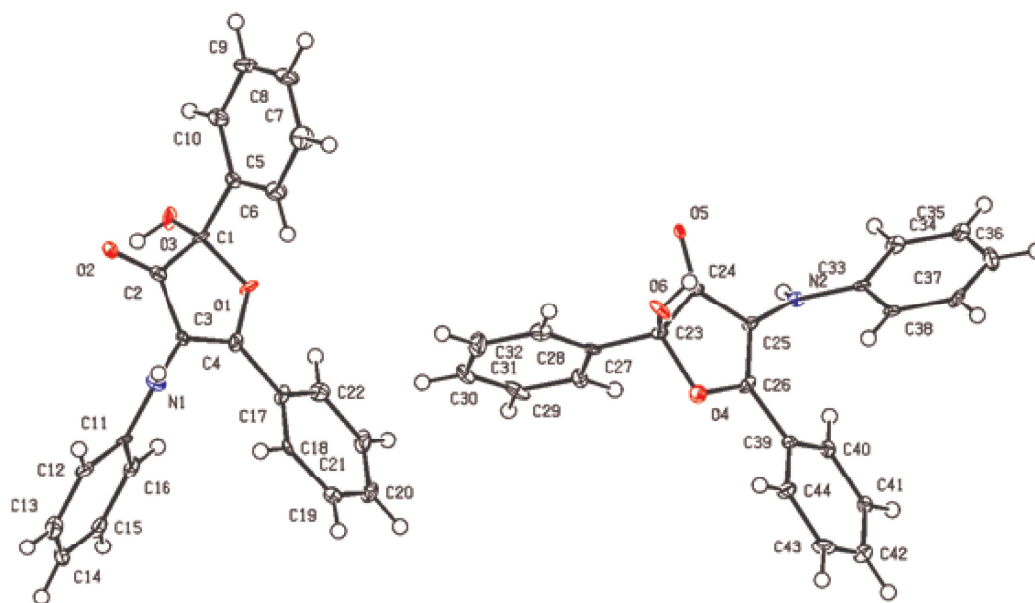

Projection of view of 2-hydroxy-2,5-diphenyl-4-(phenylamino)furan-3(2H)-one (**5**) with 50% thermal ellipsoids



**Spectral and analytical data of 3-hydroxy-2-phenylquinolin-4-yl)(phenyl)methanone (8)**

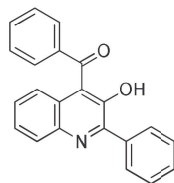

***(3-Hydroxy-2-phenylquinolin-4-yl)(phenyl)methanone (8)***

Yield: 24%, (0.0780 g); M.p. 142-144 °C; Characteristics: Pale yellow crystalline solid.;

**IR** ( $\nu$ , KBr): 3448  $\text{cm}^{-1}$  (OH), 1667  $\text{cm}^{-1}$  (C=O);  **$^1\text{H NMR}$**  (400 MHz,  $\text{CDCl}_3$ )  $\delta_{\text{H}}$  9.19 (s, 1H), 8.14 (d,  $J = 8.3$  Hz, 1H), 8.03 (d,  $J = 7.0$  Hz, 2H), 7.80 (d,  $J = 7.5$  Hz, 2H), 7.64 (t,  $J = 7.4$  Hz, 1H), 7.62-7.28 (m, 8H);  **$^{13}\text{C NMR}$**  (100 MHz,  $\text{CDCl}_3$ )  $\delta_{\text{C}}$  198.7, 151.8, 148.6, 143.1, 138.4, 136.6, 134.0, 130.1, 129.8, 129.5, 128.9, 128.6, 127.2, 127.0, 125.3, 124.9, 122.5; **MS**:  $m/z$  325.112 ( $\text{M}^+$ ). Elemental analysis calculated for  $\text{C}_{22}\text{H}_{15}\text{NO}_2$ : C, 81.21; H, 4.65; N, 4.30. Found: C, 81.14; H, 4.63; N, 4.28.

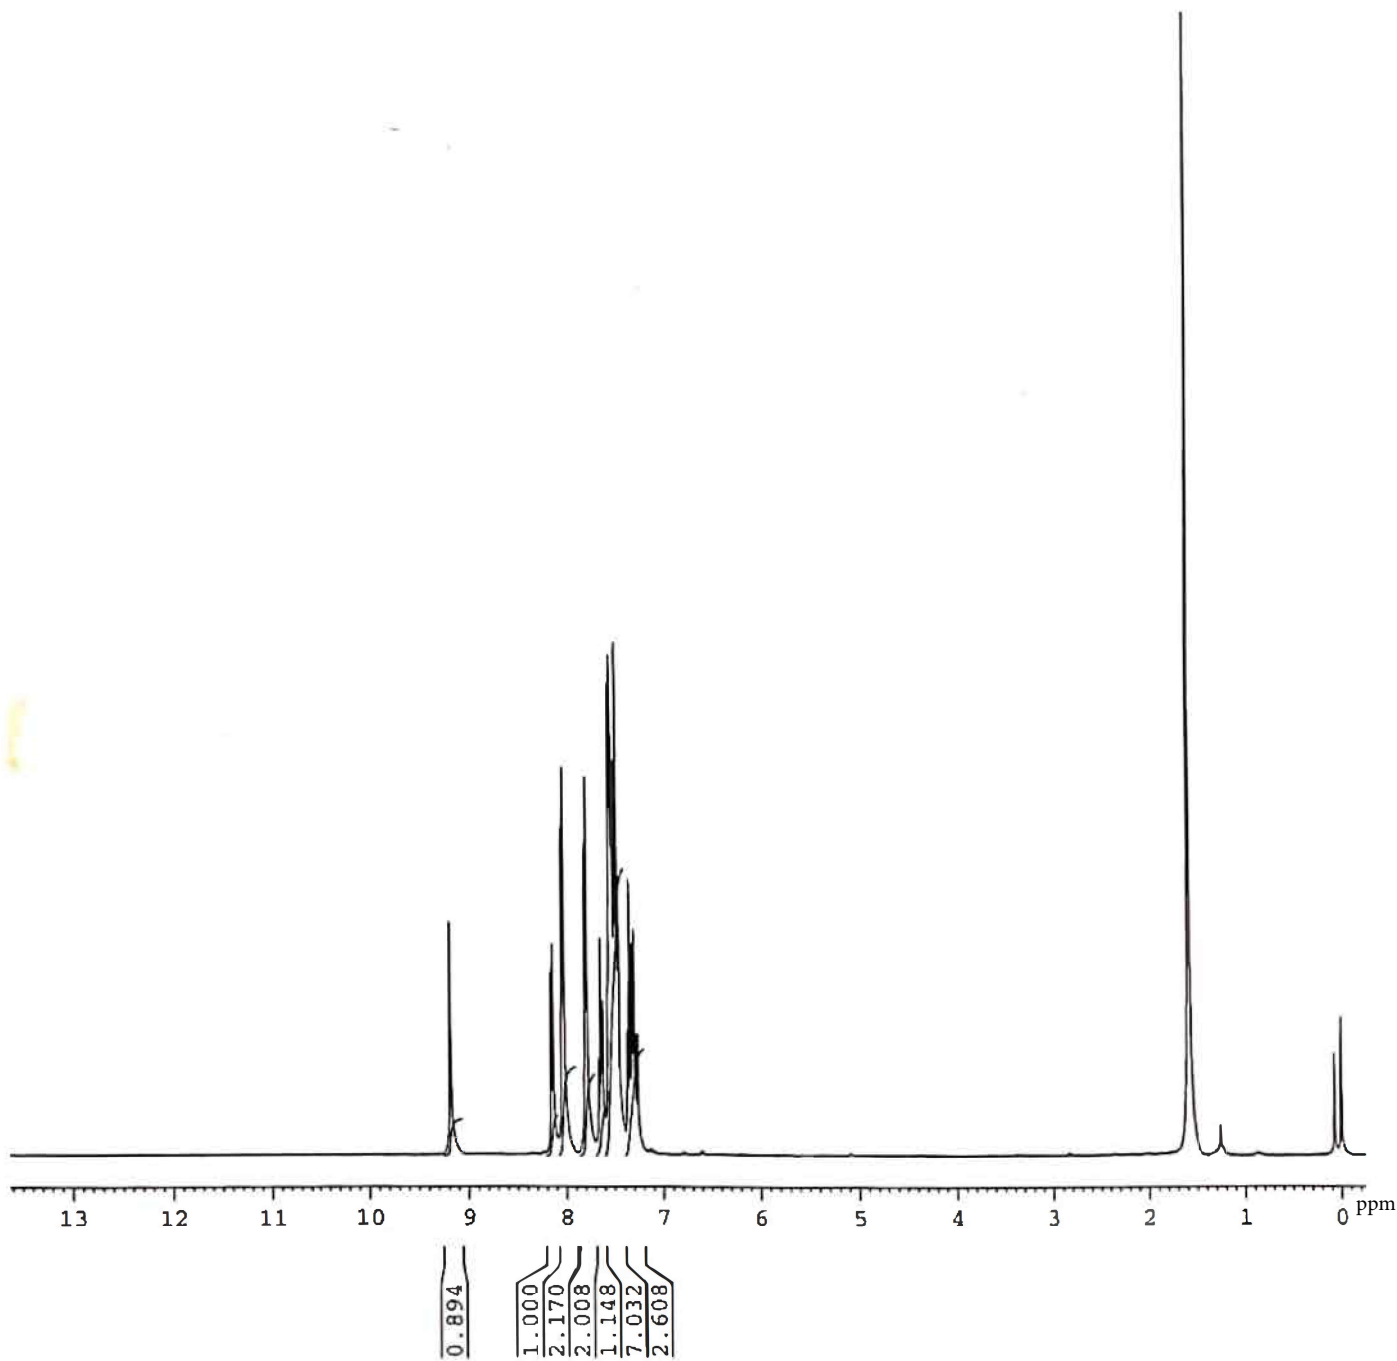

$^1\text{H}$  NMR of (3-hydroxy-2-phenylquinolin-4-yl)(phenyl)methanone (**8**)

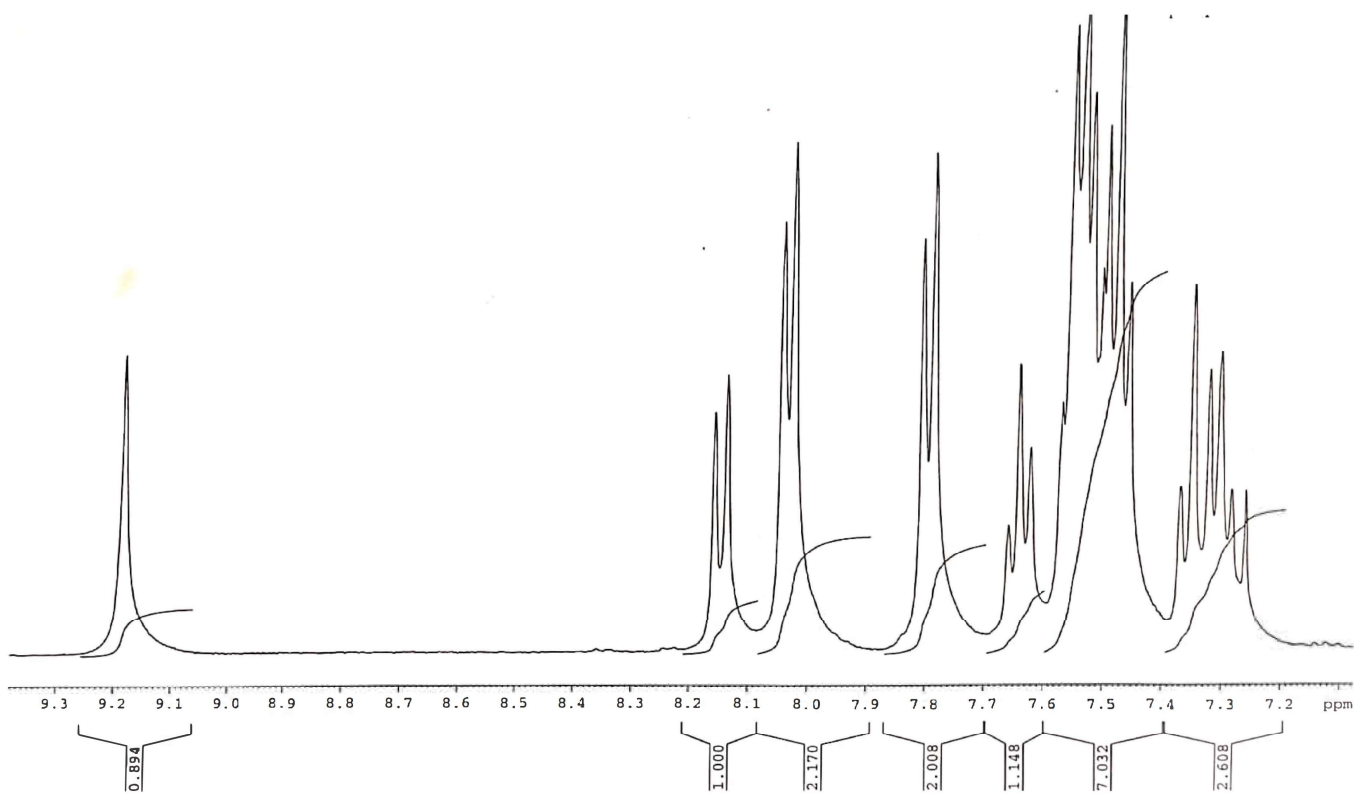

<sup>1</sup>H NMR of (3-hydroxy-2-phenylquinolin-4-yl)(phenyl)methanone (**8**): Expanded

<sup>1</sup>H NMR of (3-hydroxy-2-phenylquinolin-4-yl)(phenyl)methanone (8)

| #  | ADDRESS | FREQUENCY |         | INTENSITY |
|----|---------|-----------|---------|-----------|
|    |         | [Hz]      | [PPM]   |           |
| 1  | 13595.4 | 3675.085  | 9.1846  | 5.85      |
| 2  | 13674.7 | 3658.504  | 9.1432  | 0.50      |
| 3  | 15562.0 | 3264.010  | 8.1573  | 4.60      |
| 4  | 15601.9 | 3255.678  | 8.1365  | 5.32      |
| 5  | 15666.0 | 3242.277  | 8.1030  | 0.54      |
| 6  | 15689.9 | 3237.273  | 8.0905  | 0.42      |
| 7  | 15706.4 | 3233.824  | 8.0818  | 0.42      |
| 8  | 15714.2 | 3232.195  | 8.0778  | 0.43      |
| 9  | 15783.3 | 3217.752  | 8.0417  | 8.28      |
| 10 | 15816.5 | 3210.812  | 8.0243  | 9.80      |
| 11 | 16237.3 | 3122.864  | 7.8045  | 7.89      |
| 12 | 16273.1 | 3115.381  | 7.7858  | 9.52      |
| 13 | 16395.8 | 3089.714  | 7.7217  | 0.47      |
| 14 | 16470.9 | 3074.033  | 7.6825  | 0.41      |
| 15 | 16513.9 | 3065.034  | 7.6600  | 2.41      |
| 16 | 16549.3 | 3057.632  | 7.6415  | 5.46      |
| 17 | 16584.6 | 3050.259  | 7.6231  | 3.87      |
| 18 | 16631.1 | 3040.541  | 7.5988  | 0.95      |
| 19 | 16689.4 | 3028.364  | 7.5684  | 4.74      |
| 20 | 16720.8 | 3021.785  | 7.5519  | 11.90     |
| 21 | 16755.5 | 3014.545  | 7.5338  | 12.66     |
| 22 | 16781.2 | 3009.172  | 7.5204  | 10.61     |
| 23 | 16815.7 | 3001.964  | 7.5024  | 7.29      |
| 24 | 16831.7 | 2998.609  | 7.4940  | 9.99      |
| 25 | 16868.6 | 2990.907  | 7.4748  | 12.99     |
| 26 | 16905.4 | 2983.213  | 7.4555  | 7.02      |
| 27 | 16989.0 | 2965.723  | 7.4118  | 0.88      |
| 28 | 17004.5 | 2962.500  | 7.4038  | 0.75      |
| 29 | 17025.3 | 2958.136  | 7.3929  | 0.60      |
| 30 | 17037.4 | 2955.624  | 7.3866  | 0.63      |
| 31 | 17073.7 | 2948.032  | 7.3676  | 3.11      |
| 32 | 17111.1 | 2940.206  | 7.3480  | 6.94      |
| 33 | 17163.4 | 2929.281  | 7.3207  | 5.32      |
| 34 | 17198.8 | 2921.876  | 7.3022  | 5.67      |
| 35 | 17234.9 | 2914.324  | 7.2834  | 3.05      |
| 36 | 17280.7 | 2904.750  | 7.2594  | 3.03      |
| 37 | 28138.0 | 635.318   | 1.5878  | 28.92     |
| 38 | 28307.2 | 599.952   | 1.4994  | 0.44      |
| 39 | 28776.2 | 501.919   | 1.2544  | 0.75      |
| 40 | 31042.7 | 28.156    | 0.0704  | 2.57      |
| 41 | 31059.9 | 24.567    | 0.0614  | 0.50      |
| 42 | 31179.1 | -0.357    | -0.0009 | 3.49      |

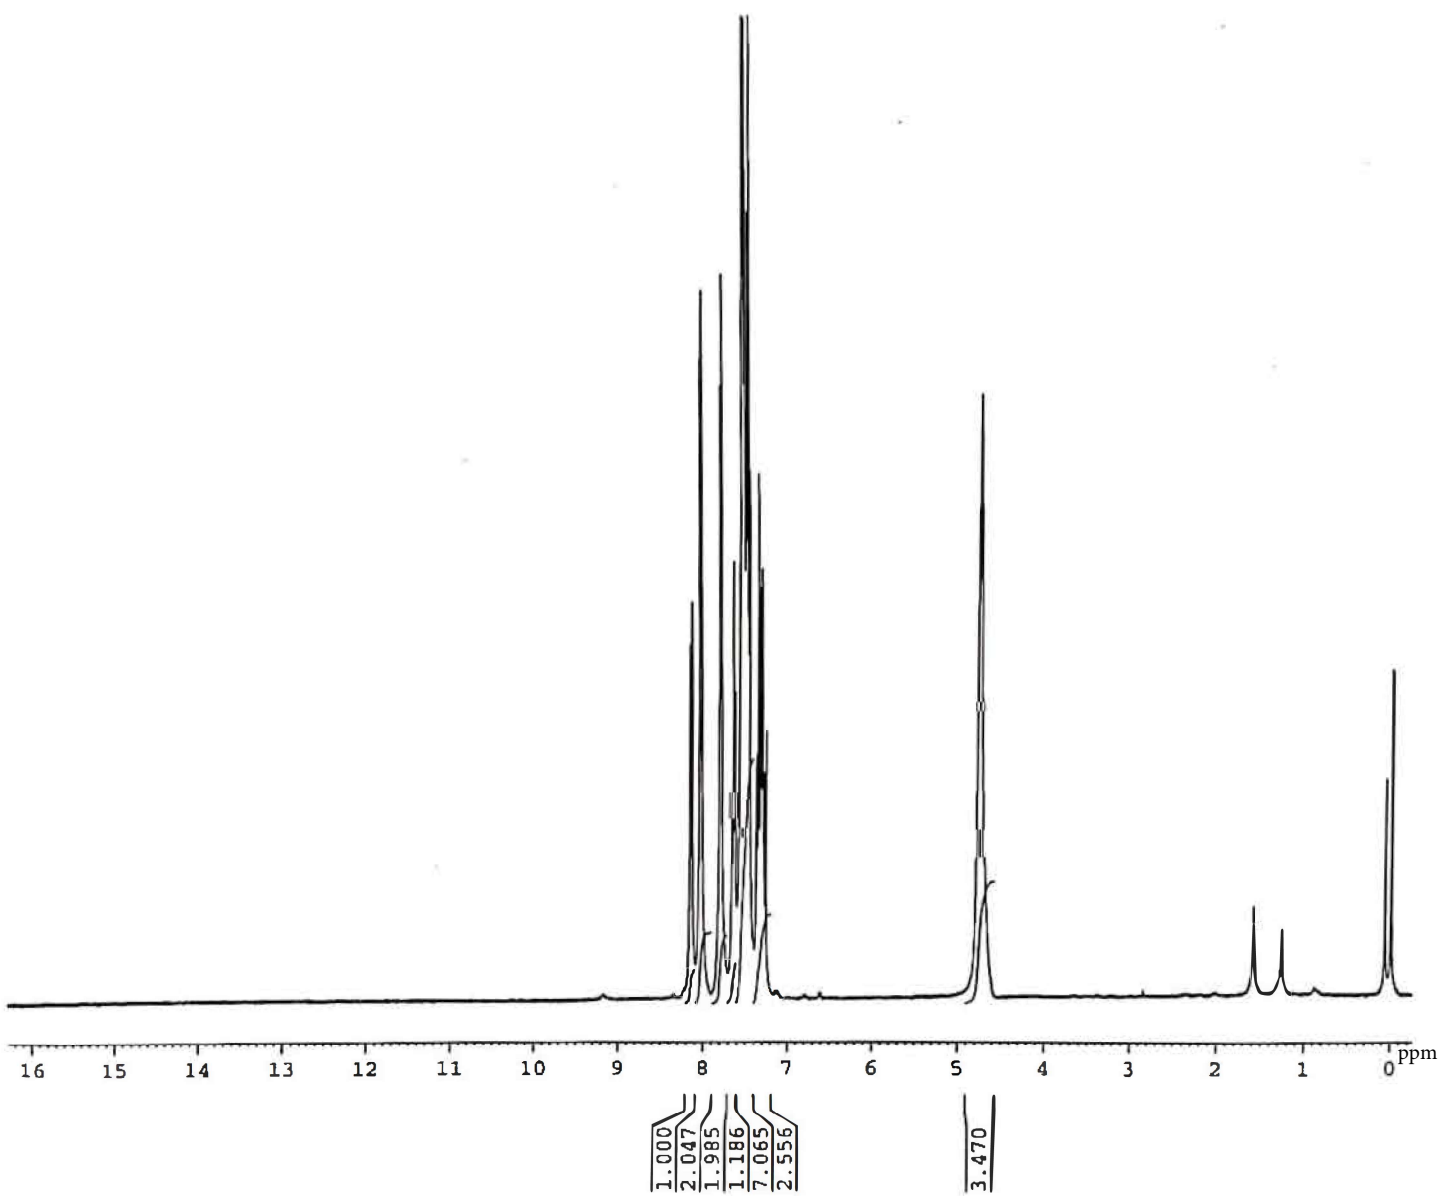

$^1\text{H}$  NMR of (3-hydroxy-2-phenylquinolin-4-yl)(phenyl)methanone (**8**) ( $\text{D}_2\text{O}$  exchanged)

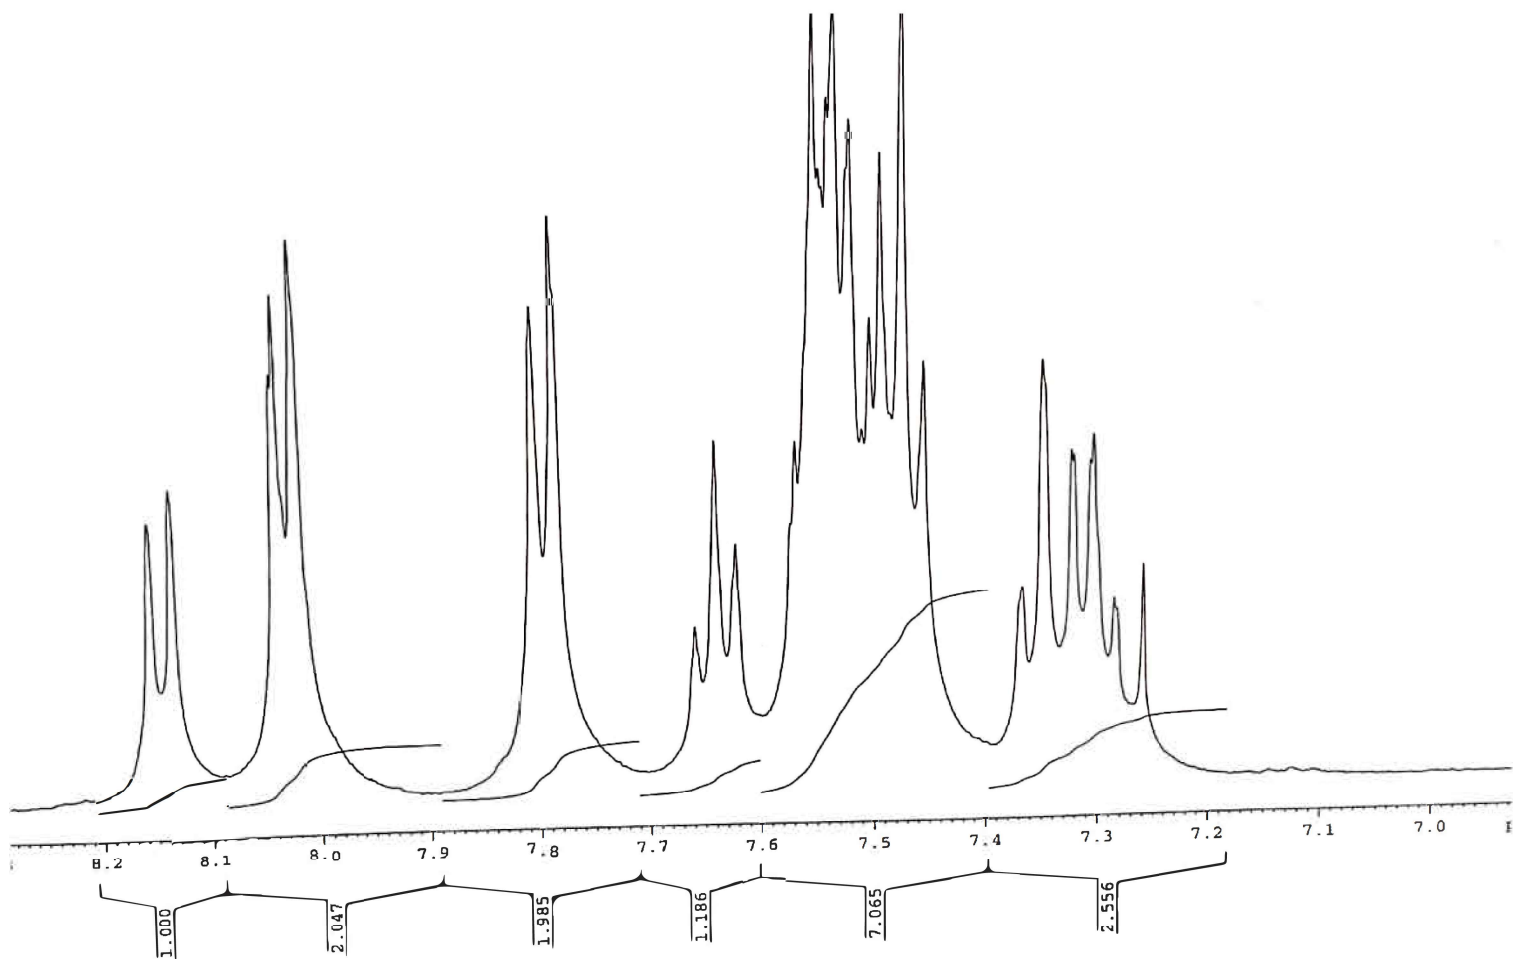

$^1\text{H}$  NMR of (3-hydroxy-2-phenylquinolin-4-yl)(phenyl)methanone (**8**) ( $\text{D}_2\text{O}$  exchanged): Expanded

<sup>1</sup>H NMR of (3-hydroxy-2-phenylquinolin-4-yl)(phenyl)methanone (**8**) (D<sub>2</sub>O exchanged)

| #  | ADDRESS | FREQUENCY |         | INTENSITY |
|----|---------|-----------|---------|-----------|
|    |         | [Hz]      | [PPM]   |           |
| 1  | 15561.6 | 3264.103  | 8.1575  | 8.22      |
| 2  | 15601.2 | 3255.824  | 8.1368  | 9.19      |
| 3  | 15784.0 | 3217.604  | 8.0413  | 12.49     |
| 4  | 15791.2 | 3216.111  | 8.0376  | 14.75     |
| 5  | 15823.5 | 3209.352  | 8.0207  | 16.37     |
| 6  | 16237.1 | 3122.905  | 7.8046  | 14.16     |
| 7  | 16271.5 | 3115.702  | 7.7866  | 16.72     |
| 8  | 16276.8 | 3114.597  | 7.7839  | 14.60     |
| 9  | 16515.7 | 3064.663  | 7.6591  | 4.72      |
| 10 | 16551.1 | 3057.264  | 7.6406  | 10.10     |
| 11 | 16586.7 | 3049.818  | 7.6220  | 7.09      |
| 12 | 16689.1 | 3028.410  | 7.5685  | 10.02     |
| 13 | 16721.2 | 3021.699  | 7.5517  | 22.44     |
| 14 | 16730.3 | 3019.802  | 7.5470  | 17.70     |
| 15 | 16735.3 | 3018.760  | 7.5444  | 17.20     |
| 16 | 16744.8 | 3016.781  | 7.5394  | 19.66     |
| 17 | 16756.2 | 3014.396  | 7.5335  | 22.38     |
| 18 | 16782.1 | 3008.978  | 7.5199  | 19.02     |
| 19 | 16802.0 | 3004.812  | 7.5095  | 10.30     |
| 20 | 16815.2 | 3002.067  | 7.5026  | 13.49     |
| 21 | 16833.5 | 2998.226  | 7.4930  | 18.10     |
| 22 | 16870.9 | 2990.408  | 7.4735  | 22.65     |
| 23 | 16907.8 | 2982.696  | 7.4542  | 12.20     |
| 24 | 17075.1 | 2947.740  | 7.3669  | 5.63      |
| 25 | 17110.0 | 2940.432  | 7.3486  | 12.12     |
| 26 | 17159.3 | 2930.135  | 7.3229  | 9.52      |
| 27 | 17163.8 | 2929.193  | 7.3205  | 9.39      |
| 28 | 17191.3 | 2923.442  | 7.3061  | 9.23      |
| 29 | 17196.9 | 2922.265  | 7.3032  | 9.94      |
| 30 | 17231.3 | 2915.080  | 7.2853  | 5.22      |
| 31 | 17281.0 | 2904.686  | 7.2593  | 6.16      |
| 32 | 22090.7 | 1899.346  | 4.7468  | 13.86     |
| 33 | 22247.6 | 1866.549  | 4.6648  | 2.10      |
| 34 | 28158.3 | 631.082   | 1.5772  | 2.09      |
| 35 | 28778.7 | 501.402   | 1.2531  | 1.56      |
| 36 | 31044.6 | 27.758    | 0.0694  | 4.99      |
| 37 | 31181.3 | -0.798    | -0.0020 | 7.46      |

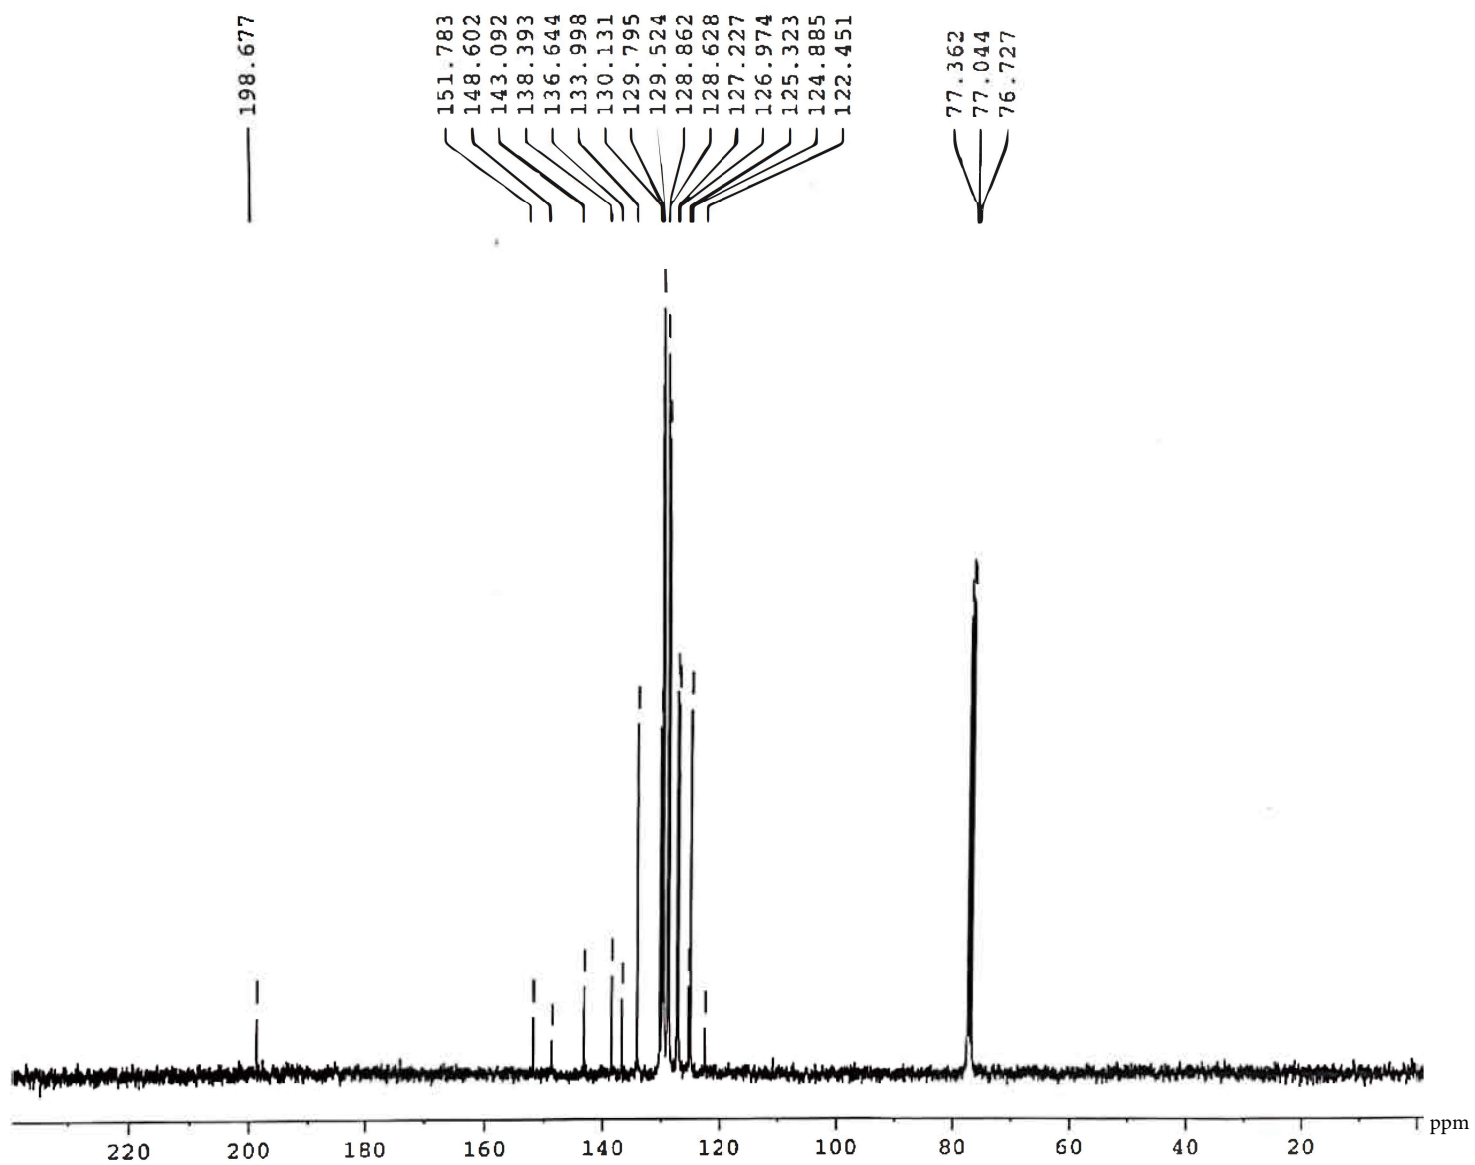

$^{13}\text{C}$  NMR of (3-hydroxy-2-phenylquinolin-4-yl)(phenyl)methanone (**8**)



**II) General procedure for the microwave assisted reaction of nitrone 1a-j with DBA (2) in acetonitrile.**

To the solution of nitrone **1a-j** (1 mmol) in 5 mL of acetonitrile, DBA (**2**, 1 mmol) was added. The resulting reaction mixture was placed on a Pyrex tube with a cover and then irradiated in a microwave oven for 15 min at 90 °C to complete the reaction. Progress of the reaction was monitored by GC. At the end of the reaction, solvent was removed under reduced pressure and products were isolated and purified by a combination of column chromatography over silica gel using hexane-dichloromethane mixtures to give furanone **5** in 19-80% yield; melting point 150-152 °C, quinoline **8** in 0-35% yield; melting point 142-144 °C along with the corresponding aldehyde **4a-j** 78-96% yield.

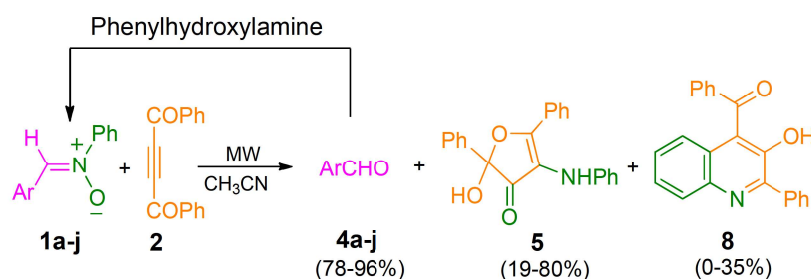

**Table 2** Product distribution in the reaction of nitrones **1a-j** with DBA (**2**) under microwave irradiation at 90 °C for 15 min.

| Entry | Ar                                               | <b>5</b><br>(%) | <b>8</b><br>(%) | <b>4a-j</b><br>(%) |
|-------|--------------------------------------------------|-----------------|-----------------|--------------------|
| 1     | phenyl ( <b>1a</b> )                             | 68              | 24              | 92                 |
| 2     | 4-methylphenyl ( <b>1b</b> )                     | 57              | 30              | 92                 |
| 3     | 4-methoxyphenyl ( <b>1c</b> )                    | 52              | <b>35</b>       | 96                 |
| 4     | 4- <i>N,N</i> -dimethylaminophenyl ( <b>1d</b> ) | 19              | -               | 78                 |
| 5     | 4-nitrophenyl ( <b>1e</b> )                      | 78              | 18              | 94                 |
| 6     | <b>4-cyanophenyl (1f)</b>                        | <b>80</b>       | 15              | 95                 |
| 7     | 4-chlorophenyl( <b>1g</b> )                      | 58              | 18              | 78                 |
| 8     | 2-pyrrolyl ( <b>1h</b> )                         | 50              | 18              | 80                 |
| 9     | 2-thienyl ( <b>1i</b> )                          | 63              | 16              | 88                 |
| 10    | 2-naphthyl ( <b>1j</b> )                         | 54              | 22              | 90                 |

**III) General procedure for the reaction of nitrone 1a,c,f with DBA (15) in acetonitrile (under conventional heating)**

Mixtures of nitrone **1a** (1 mmol, 0.1970 g) and DBA (**2**, 1 mmol, 0.2340 g) , **1c** (1 mmol, 0.2270 g) and DBA (**2**, 1 mmol, 0.2340 g) and **1f** (1 mmol, 0.2220 g) and DBA (**2**, 1 mmol, 0.2340 g) in 5 mL acetonitrile were prepared separately and stirred at reflux. Progress of the reaction was monitored by GC. After 15 minutes, the analysis shows most of the nitrones remained unchanged in the reaction mixture (55-60%). After 1h refluxing nitrones were reacted near-quantitatively. The solvent was removed under reduced pressure and products were isolated and purified by a combination of column chromatography over silica gel using hexane-dichloromethane mixtures to give furanone **5** in 50-77% yield; melting point 150-152 °C, quinoline **8** in 17-38% yield; melting point 142-144 °C along with the corresponding aldehyde **4a,c,f** in 90-94% yield (Table 3).

**Table 3** Product distribution in the reaction of nitrones **1a,c,f** with DBA (**2**) in acetonitrile at reflux for 1 hour.

| Entry | Ar                            | <b>5</b><br>(%) | <b>8</b><br>(%) | <b>4a,c,f</b><br>(%) |
|-------|-------------------------------|-----------------|-----------------|----------------------|
| 1     | phenyl ( <b>1a</b> )          | 65              | 25              | 90                   |
| 2     | 4-methoxyphenyl ( <b>1c</b> ) | 50              | 38              | 94                   |
| 3     | 4-cyanophenyl ( <b>1f</b> )   | 77              | 17              | 92                   |
